# Supplementary material for: Comparison of Oral Antidiabetic Drugs as Add-On Treatments in Patients with Type 2 Diabetes Uncontrolled on Metformin: A Network Meta-Analysis
Source: Springer Nature journal article supplement (doi:10.1007/s13300-018-0482-5), 2018-08-18
Supplement: MOESM1 [file 16053666]

## Online Supplementary Appendix

**Table S1.** Search Strategies

**Table S2.** Characteristics of included Studies

**Table S3.** Assessment of risk of bias in individual studies

**Table S4.** Assessment of loop inconsistency in networks

**Table S5.** Assessment of global inconsistency in networks using the ‘design-by-treatment’ model

**Table S6.** Pairwise random-effects meta-analyses for efficacy and safety outcomes

**Table S7.** Contributions of direct evidence in the entire network

**Table S8.** Sensitivity analyses for the primary outcomes

**Figure S1.** Network maps of efficacy and safety outcomes of oral antidiabetic drugs

**Figure S2.** Network estimates of treatment effects for oral antidiabetic drugs

**Figure S3.** Comparison-adjusted funnel plot for the network meta-analysis on primary outcomes

**References**

**Table S1.** Search Strategies

| <b>Data source</b> | <b>Search terms</b>                                                                                                                                                                                              |
|--------------------|------------------------------------------------------------------------------------------------------------------------------------------------------------------------------------------------------------------|
| <b>PubMed</b>      | #1 Sodium glucose co-transporter 2                                                                                                                                                                               |
|                    | #2 SGLT2 OR SGLT-2 OR SGLT 2                                                                                                                                                                                     |
|                    | #3 Tofogliflozin OR Empagliflozin OR Dapagliflozin OR<br>Canagliflozin OR Sotagliflozin OR Luseogliflozin OR<br>Ipragliflozin OR Remogliflozin OR Sergliflozin OR Ertugliflozin                                  |
|                    | #4 OR#1 - #3                                                                                                                                                                                                     |
|                    | #5 DPP-4 OR DDP4 OR DPP 4                                                                                                                                                                                        |
|                    | #6 Vildagliptin OR Saxagliptin OR Sitagliptin OR Linagliptin OR<br>Alogliptin OR Dutogliptin OR Gemigliptin OR Camegliptin OR<br>Teneligliptin                                                                   |
|                    | #7 #5 OR #6                                                                                                                                                                                                      |
|                    | #8 Meglitinide OR Mitiglinide OR Nateglinide OR Repaglinide                                                                                                                                                      |
|                    | #9 Sulphonylurea OR Acetohexamide OR Carbutamide OR<br>Chlorpropamide OR Glibenclamide OR Glibornuride OR<br>Gliclazide OR Glimepiride OR Glipizide OR Gliquidone OR<br>Tolazamide OR Glyburide OR Glycopyramide |
|                    | #10 Alpha glucosidase inhibitor OR Acarbose OR Miglitol OR                                                                                                                                                       |

---

Voglibose

#11 Glitazone OR Thiazolidinedione OR Pioglitazone OR

Rivoglitazone OR Rosiglitazone

#12 #4 OR #7 OR #8 OR #9 OR #10 #11

#13 Diabetes mellitus or Diabetes

#14 random\*

#15 "Randomized Controlled Trial"[Publication Type]

#16 RCT or RCTs

#17 OR/#14 - #16

#18 #12 AND #13 AND #17

**CENTRAL**

TITLE-ABSTRACT- KEYWORDS (Sodium Glucose

co-transporter 2 OR SGLT2 OR SGLT-2 OR SGLT 2 OR

Tofogliflozin OR Empagliflozin OR Dapagliflozin OR

Canagliflozin OR Sotagliflozin OR luseogliflozin OR Ipragliflozin

OR Remogliflozin OR Sergliflozin OR Ertugliflozin OR DPP-4

OR DDP4 OR DPP 4 OR Vildagliptin OR Saxagliptin OR

Sitagliptin OR Linagliptin OR Alogliptin OR Dutogliptin OR

Gemigliptin OR Camegliptin OR Teneligliptin OR Meglitinide

OR Mitiglinide OR Nateglinide OR Repaglinide OR

Sulphonylurea OR Acetohexamide OR Carbutamide OR

Chlorpropamide OR Glibenclamide OR Glibornuride OR  
Gliclazide OR Glimepiride OR Glipizide OR Gliquidone OR  
Tolazamide OR Glyburide OR Glycopyramide OR Alpha  
glucosidase inhibitor OR Acarbose OR Miglitol OR Voglibose  
OR Glitazone OR Thiazolidinedione OR Pioglitazone OR  
Rivoglitazone OR Rosiglitazone) AND (Diabetes mellitus or  
Diabetes)

**Embase**

TITLE-ABSTRACT-AUTHOR KEYWORDS (Sodium Glucose  
co-transporter 2 OR SGLT2 OR SGLT-2 OR SGLT 2 OR  
Tofogliflozin OR Empagliflozin OR Dapagliflozin OR  
Canagliflozin OR Sotagliflozin OR luseogliflozin OR Ipragliflozin  
OR Remogliflozin OR Sergliflozin OR Ertugliflozin OR DPP-4  
OR DDP4 OR DPP 4 OR Vildagliptin OR Saxagliptin OR  
Sitagliptin OR Linagliptin OR Alogliptin OR Dutogliptin OR  
Gemigliptin OR Camegliptin OR Teneligliptin OR Meglitinide  
OR Mitiglinide OR Nateglinide OR Repaglinide OR  
Sulphonylurea OR Acetohexamide OR Carbutamide OR  
Chlorpropamide OR Glibenclamide OR Glibornuride OR  
Gliclazide OR Glimepiride OR Glipizide OR Gliquidone OR  
Tolazamide OR Glyburide OR Glycopyramide OR Alpha  
glucosidase inhibitor OR Acarbose OR Miglitol OR Voglibose  
OR Glitazone OR Thiazolidinedione OR Pioglitazone OR

---

Rivoglitazone OR Rosiglitazone) AND (Diabetes mellitus or  
Diabetes) AND (RCT\* OR random\*)

---

**Table S2.** Characteristics of included Studies

| <b>Author<br/>(year)</b> | <b>trial<br/>registr<br/>ation</b> | <b>Intervention<br/>s</b> | <b>Sample<br/>size (n)</b> | <b>Mean<br/>Age<br/>(years)</b> | <b>Mean<br/>Sex<br/>(man%)</b> | <b>Mean<br/>HbA1c<sup>u</sup><br/>(%)</b> | <b>Mean body<br/>weight (kg)</b> | <b>Mean<br/>BMI<sup>t</sup><br/>(kg/m<sup>2</sup>)</b> | <b>Mean duration<br/>of diabetes<br/>(years)</b> | <b>Follow-up<br/>(weeks)</b> |
|--------------------------|------------------------------------|---------------------------|----------------------------|---------------------------------|--------------------------------|-------------------------------------------|----------------------------------|--------------------------------------------------------|--------------------------------------------------|------------------------------|
| Bolinder<br>(2014) [1]   | NCT00<br>855166                    | Dapa <sup>a</sup> : 10mg  | 89                         | 60.6                            | 55.1                           | 7.2                                       | 92.1                             | 32.1                                                   | 6.0                                              | 102                          |
|                          |                                    | PLA <sup>s</sup>          | 91                         | 60.8                            | 56.0                           | 7.2                                       | 90.9                             | 31.7                                                   | 5.5                                              | 102                          |
|                          |                                    | Dapa: 2.5mg               | 137                        | 55                              | 51                             | 8.0                                       | 84.9                             |                                                        | 6                                                | 102                          |
| Baily<br>(2013) [2]      | NCT00<br>528879                    | Dapa:5mg                  | 137                        | 54.3                            | 50                             | 8.2                                       | 84.7                             |                                                        | 6.4                                              | 102                          |
|                          |                                    | Dapa: 10mg                | 135                        | 52.7                            | 57                             | 8.0                                       | 86.3                             | NA <sup>v</sup>                                        | 6.1                                              | 102                          |
|                          |                                    | PLA                       | 137                        | 53.7                            | 55                             | 8.1                                       | 87.7                             |                                                        | 5.8                                              | 102                          |

---

|            |        |                           |     |      |      |     |      |      |     |     |
|------------|--------|---------------------------|-----|------|------|-----|------|------|-----|-----|
| Lava-Gon   |        | Cana <sup>c</sup> :100mg  | 368 | 55.3 | 47.0 | 7.9 | 88.8 | 32.4 | 6.7 | 52  |
|            | NCT01  |                           |     |      |      |     |      |      |     |     |
| zalez      |        | Cana:300mg                | 367 | 55.5 | 47.3 | 7.9 | 85.4 | 31.4 | 7.1 | 52  |
|            | 106677 |                           |     |      |      |     |      |      |     |     |
| (2013) [3] |        | Sita <sup>f</sup> : 100mg | 366 | 55.5 | 45.0 | 7.9 | 87.7 | 32.0 | 6.8 | 52  |
| Rosenstoc  |        | Dapa: 5mg                 | 179 | 54   | 50   | 8.9 | NA   | 31.5 | 7.4 | 24  |
|            | NCT01  |                           |     |      |      |     |      |      |     |     |
| k (2015)   |        | Saxa <sup>g</sup> : 10mg  | 176 | 55   | 47   | 9.0 | NA   | 31.8 | 8.2 | 24  |
|            | 606007 |                           |     |      |      |     |      |      |     |     |
| [4]        |        |                           |     |      |      |     |      |      |     |     |
| Del Prato  | NCT00  | Dapa: 10mg                | 400 | 58.1 | 55.3 | 7.7 | 88.4 | 31.7 | 6.1 | 208 |
| (2015) [5] | 660907 | Glip: 20mg                | 401 | 58.6 | 54.9 | 7.7 | 87.6 | 31.2 | 6.6 | 208 |
| Merker     | NCT01  | Empa <sup>b</sup> : 10mg  | 217 | 55.5 | 57.6 | 7.9 | 81.6 | 29.1 |     | 76  |
|            |        |                           |     |      |      |     |      |      | 6.3 |     |
| (2015) [6] | 159600 | Empa: 25mg                | 213 | 55.6 | 56.3 | 7.9 | 82.2 | 29.7 |     | 76  |

---

|                      |                 |            |     |      |      |     |      |      |     |    |
|----------------------|-----------------|------------|-----|------|------|-----|------|------|-----|----|
|                      | /NCT0           |            |     |      |      |     |      |      |     |    |
|                      | 128999          | PLA        | 207 | 56.0 | 56.0 | 7.9 | 79.7 | 28.7 |     | 76 |
|                      | 0               |            |     |      |      |     |      |      |     |    |
|                      |                 | Vild: 50mg | 177 | 54.3 | 57.3 | 8.4 | NA   | 32.1 | 6.8 | 24 |
| BOSI<br>(2007) [7]   | NCT00<br>099892 | Vild:100mg | 185 | 53.9 | 61.5 | 8.4 | NA   | 32.9 | 5.8 | 24 |
|                      |                 | PLA        | 182 | 54.9 | 53.1 | 8.3 | NA   | 33.2 | 5.2 | 24 |
|                      |                 | Tene:5mg   | 87  | 58.8 | 52.9 | 8.0 | 92.8 | 32.2 | 4.7 | 24 |
| Bryson<br>(2016) [8] | NCT00<br>971243 | Tene:10mg  | 93  | 58.5 | 54.8 | 7.8 | 91.2 | 32.2 | 4.8 | 24 |
|                      |                 | Tene:20mg  | 91  | 58.3 | 61.5 | 8.0 | 94.7 | 33.0 | 5.3 | 24 |
|                      |                 | Tene:40mg  | 88  | 58.2 | 59.1 | 7.9 | 93.3 | 32.2 | 5.1 | 24 |



---

|                               |                 |                                      |            |              |              |            |              |              |            |          |
|-------------------------------|-----------------|--------------------------------------|------------|--------------|--------------|------------|--------------|--------------|------------|----------|
|                               |                 | PLA                                  | 88         | 58.9         | 53.4         | 7.9        | 92.1         | 32.0         | 4.8        | 24       |
| Charbonne<br>l (2006)<br>[9]  | NCT00<br>86515  | Sita:100mg<br>PLA                    | 464<br>237 | 54.4<br>54.7 | 55.8<br>59.5 | 8.0<br>8.0 | 86.7<br>89.6 | 30.9<br>31.5 | 6.0<br>6.6 | 24<br>24 |
| Ahren<br>(2004)<br>[10]       | NA              | Vild: 50mg<br>PLA                    | 42<br>29   | 58.4<br>54.3 | 61.9<br>75.9 | 7.6<br>7.8 | NA<br>NA     | 29.6<br>29.9 | 5.8<br>4.6 | 52<br>52 |
| Handelsm<br>an (2017)<br>[11] | NCT01<br>682759 | Oma: 25mg<br>Glim <sup>m</sup> : 6mg | 376<br>375 | 58<br>58     | 54.0<br>56.3 | 7.5<br>7.4 | 87.5<br>88.7 | 31.2<br>31.7 | 7.6<br>7.7 | 54<br>54 |
| Gadde                         | NCT01           | Sita:100mg                           | 122        | 54.3         | 54.1         | 8.4        | 88.1         | 31.6         | 7.9        | 28       |

---

|            |        |                          |     |      |      |     |       |      |     |    |
|------------|--------|--------------------------|-----|------|------|-----|-------|------|-----|----|
| (2017)     | 652729 | PLA                      | 61  | 53.4 | 60.7 | 8.5 | 89.0  | 31.5 | 8.7 | 28 |
| [12]       |        |                          |     |      |      |     |       |      |     |    |
| Du (2017)  | NCT02  | Saxa: 5mg                | 238 | 54.7 | 61.8 | 8.2 | 73.3  | 26.4 | 5.1 | 24 |
| [13]       | 243176 | Acar <sup>P</sup> : 50mg | 243 | 56.5 | 56.8 | 8.2 | 72.6  | 26.3 | 5.3 | 24 |
| Yang       |        | Dapa: 5mg                | 147 | 53.1 | 45.6 | 8.1 | 70.8  | 26.4 | 4.2 | 24 |
| (2016)     | NCT01  | Dapa: 10mg               | 152 | 54.6 | 57.9 | 8.2 | 71.4  | 26.2 | 5.3 | 24 |
| [14]       | 095666 | PLA                      | 145 | 53.5 | 59.3 | 8.1 | 70.9  | 25.7 | 5.3 | 24 |
| Lu (2016)  | NCT01  | Ipra <sup>d</sup> : 50mg | 87  | 53.9 | 50.6 | 7.7 | 70.36 | 26.6 | 6.4 | 24 |
| [15]       | 505426 | PLA                      | 83  | 53.4 | 39.8 | 7.8 | 70.45 | 27.0 | 5.7 | 24 |
| Tai (2016) | NCT02  | Alog <sup>i</sup> : 25mg | 44  | 53.8 | 61.4 | 8.2 | NA    | 31.1 | 6.6 | 26 |

---

|           |                 |                          |      |      |      |     |      |      |      |    |
|-----------|-----------------|--------------------------|------|------|------|-----|------|------|------|----|
| [16]      | 798172          | Met: 1000mg              | 37   | 53.4 | 59.5 | 8.2 | NA   | 30.6 | 6.6  | 26 |
| DeFronzo  |                 | Empa: 10mg               | 137  | 56.1 | 56.9 | 8.0 | 86.1 | 30.9 | NA   | 52 |
| (2015)    | NCT01<br>422876 | Empa: 25mg               | 140  | 55.5 | 46.4 | 8.0 | 87.7 | 31.8 | NA   | 52 |
| [17]      |                 | Lina <sup>h</sup> : 5mg  | 128  | 56.2 | 50.0 | 8.0 | 85.0 | 30.6 | NA   | 52 |
| Ji (2016) | NCT01           | Vild <sup>e</sup> : 50mg | 2501 | 56.5 | 54.4 | 7.2 | 69.3 | 25.1 | 4.3  | 24 |
| [18]      | 541956          | Met:1000mg               | 484  | 56.2 | 49.6 | 7.2 | 68.7 | 25.1 | 4.1  | 24 |
| Wang      |                 | Lina: 5mg                | 205  | 55.1 | 49.8 | 8.0 | 68.1 | 25.5 | NA   | 24 |
| (2016)    | NCT01<br>215097 | PLA                      | 101  | 56.5 | 50   | 8.0 | 68.5 | 25.8 | NA   | 24 |
| [19]      |                 |                          |      |      |      |     |      |      |      |    |
| Wang      | NA              | Saxa: 5mg                | 41   | 64.3 | 43.9 | 8.3 | 65.2 | NA   | 12.3 | 26 |

---

|                     |             |                           |     |      |      |     |      |      |      |     |
|---------------------|-------------|---------------------------|-----|------|------|-----|------|------|------|-----|
| (2015)              |             | Acar: 50mg                | 40  | 65.1 | 47.5 | 7.7 | 63.9 |      | 14.2 | 26  |
| [20]                |             |                           |     |      |      |     |      |      |      |     |
| Schernthaler (2015) | NCT01006603 | Saxa:5mg                  | 360 | 72.5 | 60.3 | 7.6 | NA   | 29.9 | 7.6  | 52  |
| [21]                |             | Glim:<6mg                 | 360 | 72.7 | 63.3 | 7.6 | NA   | 29.3 | 7.6  | 52  |
| Ridderstrale (2014) | NCT01167881 | Empa: 25mg                | 765 | 56.2 | 56   | 7.9 | 82.5 | 30.0 | NA   | 104 |
| [22]                |             | Glim:1-4mg                | 780 | 55.7 | 54   | 7.9 | 83.0 | 30.3 | NA   | 104 |
| Del Prato (2014)    | NCT00856284 | Alog:12.5mg               | 880 | 55.2 | 47.6 | 7.6 | NA   | 31.3 | 5.7  | 104 |
| [23]                |             | Alog: 25mg                | 885 | 55.5 | 51.1 | 7.6 | NA   | 31.3 | 5.4  | 104 |
|                     |             | Glip <sup>n</sup> :5-20mg | 874 | 55.4 | 50.5 | 7.6 | NA   | 31.1 | 5.5  | 104 |

---

|           |        |             |     |      |      |     |       |      |     |    |
|-----------|--------|-------------|-----|------|------|-----|-------|------|-----|----|
| Derosa    |        | Vild: 100mg | 81  | 57.2 | 49.4 | 7.9 | 77.8  | 27.9 | 6.9 | 26 |
| (2014)    | NA     |             |     |      |      |     |       |      |     |    |
| [24]      |        | Glim:6mg    | 86  | 59.8 | 49.8 | 7.7 | 77    | 27.6 | 6.8 | 26 |
| Kashiwagi |        | Ipra: 50mg  | 112 | 56.2 | 58.9 | 8.3 | 68.52 | 26.0 | 7.4 | 24 |
| (2015)    | NCT01  |             |     |      |      |     |       |      |     |    |
| [25]      | 135433 | PLA         | 56  | 57.7 | 68.9 | 8.4 | 67.51 | 25.5 | 7.9 | 24 |
| Cefalu    |        | Cana:100mg  | 483 | 56.4 | 52   | 7.8 | 86.9  | 31.0 | 6.5 | 52 |
| (2013)    | NCT00  |             |     |      |      |     |       |      |     |    |
| [26]      | 968812 | Cana:300mg  | 485 | 55.8 | 50   | 7.8 | 86.6  | 31.2 | 6.7 | 52 |
|           |        | GLIM        | 482 | 56.3 | 55   | 7.8 | 86.5  | 30.9 | 6.6 | 52 |
| Berndt-Zi |        | Vild:100mg  | 22  | 57   | 68.2 | 7.4 | 99.3  | 34.6 | 8.4 | 24 |
| pfel      | NA     |             |     |      |      |     |       |      |     |    |
| (2013)    |        | Glim:0.5-4m | 22  | 60   | 59.1 | 7.3 | 93.7  | 33.3 | 6.1 | 24 |

---

|           |        |             |     |      |      |     |      |      |     |     |
|-----------|--------|-------------|-----|------|------|-----|------|------|-----|-----|
| [27]      |        | g           |     |      |      |     |      |      |     |     |
| Yang      |        | Sita:100mg  | 197 | 54.1 | 47   | 8.5 | 67.9 | 25.3 | 6.4 | 24  |
| (2012)    | NCT00  |             |     |      |      |     |      |      |     |     |
| [28]      | 813995 | PLA         | 198 | 55.1 | 55   | 8.5 | 68.9 | 25.3 | 7.3 | 24  |
| Gallwitz  |        | Lina: 5mg   | 777 | 59.8 | 60   | 7.7 | 86.1 | 86.1 |     | 104 |
| (2012)    | NCT00  |             |     |      |      |     |      |      | NA  |     |
| [29]      | 622284 | Glim: 1mg   | 775 | 59.8 | 61   | 7.7 | 86.8 | 86.8 |     | 104 |
| Derosa    |        | Sita: 100mg | 91  | 55.9 | 46.2 | 8.1 | 78.4 | 28.1 | 5.8 | 52  |
| (2012)    | NA     |             |     |      |      |     |      |      |     |     |
| [30]      |        | PLA         | 87  | 54.8 | 50.2 | 8.0 | 78.6 | 28.9 | 5.4 | 52  |
| Derosa- a | NA     | Vild:100mg  | 84  | 54.2 | 50.0 | 8.1 | 76.9 | 27.9 | 6.1 | 52  |

---

|           |        |            |     |      |      |     |       |      |     |    |
|-----------|--------|------------|-----|------|------|-----|-------|------|-----|----|
| (2012)    |        | PLA        | 83  | 52.4 | 51.8 | 8.2 | 78.5  | 27.8 | 6.3 | 52 |
| [31]      |        |            |     |      |      |     |       |      |     |    |
| Yang      | NCT00  | Saxa: 5mg  | 283 | 53.8 | 48.1 | 7.9 | 68.9  | 26.3 | 5.1 | 24 |
| (2011)    | 661362 | PLA        | 287 | 54.4 | 48.4 | 7.9 | 69    | 26.1 | 5.1 | 24 |
| [32]      |        |            |     |      |      |     |       |      |     |    |
| Bergental | NCT00  | Sita:100mg | 185 | 55.5 | 59   | 7.9 | 92.5  | 32.4 | 6.0 | 24 |
| (2012)    | 754988 | PLA        | 93  | 56.1 | 52   | 8.0 | 91.1  | 32.5 | 5.5 | 24 |
| [33]      |        |            |     |      |      |     |       |      |     |    |
| Pan       |        | Vild:100mg | 146 | 54.2 | 50.0 | 8.1 | 71.58 | 26.0 | 4.9 | 24 |
| (2012)    | NA     | Vild:50mg  | 148 | 53.7 | 55.4 | 8.1 | 68.36 | 25.0 | 5.0 | 24 |
| [34]      |        | PLA        | 144 | 54.5 | 54.2 | 8.0 | 69.83 | 25.5 | 5.2 | 24 |

---

|          |        |             |      |      |      |     |      |      |     |     |
|----------|--------|-------------|------|------|------|-----|------|------|-----|-----|
| Jeon     |        | Vild:100mg  | 54   | 53.5 | 68.6 | 8.0 | NA   | 22.7 | 5.9 | 32  |
| (2011)   | NA     |             |      |      |      |     |      |      |     |     |
| [35]     |        | Glim: 4mg   | 52   | 55.4 | 60.8 | 8.1 | NA   | 22.3 | 5.9 | 32  |
| Seck     |        | Sita:100mg  | 248  | 57.6 | 57.3 | 7.3 | 88.5 | 30.9 | 5.8 | 104 |
| (2010)   | NCT00  |             |      |      |      |     |      |      |     |     |
| [36]     | 094770 | Glip:5-20mg | 256  | 57.0 | 62.9 | 7.3 | 90.3 | 31.3 | 5.7 | 104 |
| Goke     |        | Saxa: 5mg   | 428  | 57.5 | 49.5 | 7.7 | 88.7 | 31.5 | 5.5 | 52  |
| (2010)   | NA     |             |      |      |      |     |      |      |     |     |
| [37]     |        | Glip:5-20mg | 430  | 57.6 | 54.0 | 7.7 | 88.6 | 31.3 | 5.4 | 52  |
| Matthews | EudraT | Vild:2-6mg  | 1562 | 57.5 | 53.1 | 7.3 | 89.5 | 31.9 | 5.7 | 104 |
| (2010)   | 200400 |             |      |      |      |     |      |      |     |     |
| [38]     | 455921 | Glim:100mg  | 1556 | 57.5 | 53.9 | 7.3 | 88.9 | 31.7 | 5.7 | 104 |



---

|            |        |             |     |      |      |     |      |      |     |    |
|------------|--------|-------------|-----|------|------|-----|------|------|-----|----|
| Filozof    |        | Vild:100mg  | 513 | 59.2 | 52.2 | 8.5 | 85.7 | 31.2 | 6.4 | 52 |
| (2010)     | NA     | Glic:80-320 |     |      |      |     |      |      |     |    |
| [39]       |        | mg          | 494 | 59.7 | 51.8 | 8.5 | 84.2 | 30.8 | 6.8 | 52 |
| Filozof-a  |        | Vild:100mg  | 456 | 56.9 | 49.6 | 7.4 | 84.6 | 31.1 | 4.6 | 24 |
| (2010)     | NCT00  |             |     |      |      |     |      |      |     |    |
| [40]       | 396357 | Met         | 458 | 57.0 | 55   | 7.3 | 84.4 | 31.2 | 4.7 | 24 |
| Arechaval  |        | Sita:100mg  | 516 | 56.3 | 55.0 | 7.5 | 80.6 | 29.7 | 6.8 | 30 |
| eta (2011) | NCT00  |             |     |      |      |     |      |      |     |    |
| [41]       | 701090 | Glim:1-6mg  | 519 | 56.2 | 53.8 | 7.5 | 82.0 | 30.2 | 6.7 | 30 |
| Taskinen   |        | Lina:5mg    | 523 | 56.5 | 53   | 8.1 | 82.2 | 29.9 | NA  | 24 |
| (2011)     | NCT00  |             |     |      |      |     |      |      |     |    |
| [42]       | 601250 | PLA         | 177 | 56.6 | 57   | 8.0 | 83.3 | 30.1 | NA  | 24 |

---

|           |        |                         |     |      |      |     |       |      |     |    |
|-----------|--------|-------------------------|-----|------|------|-----|-------|------|-----|----|
| Goodman   |        | Vild:100mg              | 248 | 54.9 | 52.8 | 8.5 | NA    | 31.4 | NA  | 24 |
| (2009)    | NA     |                         |     |      |      |     |       |      |     |    |
| [43]      |        | PLA                     | 122 | 54.5 | 67.2 | 8.7 | NA    | 31.7 | NA  | 24 |
| Bergental |        | Sita:100mg              | 166 | 52   | 52   | 8.5 | 87    | 32   | 5   | 26 |
| (2010)    | NCT00  |                         |     |      |      |     |       |      |     |    |
| [44]      | 637273 | Piog <sup>q</sup> :45mg | 165 | 53   | 48   | 8.5 | 88    | 32   | 6   | 26 |
| Nauck     |        | Alog:12.5mg             | 213 | 55   | 47.4 | 7.9 | NA    | 32   | 6   | 26 |
| (2009)    | NCT00  |                         |     |      |      |     |       |      |     |    |
| [45]      | 286442 | Alog:25mg               | 210 | 54   | 57.3 | 7.9 | NA    | 32   | 6   | 26 |
|           |        | PLA                     | 104 | 56   | 48   | 8.0 | NA    | 32   | 6   | 26 |
| DeFronzo  | NCT00  | Saxa:2.5mg              | 192 | 54.7 | 43.2 | 8.1 | 85.97 | 31.7 | 6.7 | 24 |
| (2009)    | 121667 | Saxa:5mg                | 191 | 54.7 | 53.9 | 8.1 | 87.26 | 31.2 | 6.4 | 24 |

---

|        |        |              |     |      |      |     |       |      |     |    |
|--------|--------|--------------|-----|------|------|-----|-------|------|-----|----|
| [46]   |        | Saxa:10mg    | 181 | 54.2 | 52.5 | 8.0 | 87.83 | 31.1 | 6.3 | 24 |
|        |        | PLA          | 179 | 54.8 | 53.6 | 8.1 | 87.14 | 31.6 | 6.7 | 24 |
| Bolli  |        | Vild:50mg    | 295 | 56.3 | 61.7 | 8.4 | 91.8  | 32.2 | 6.4 | 52 |
| (2009) | NA     |              |     |      |      |     |       |      |     |    |
| [47]   |        | Piog:30mg    | 281 | 57.0 | 64.1 | 8.4 | 91.2  | 32.1 | 6.4 | 52 |
| Raz    |        | Sita:100mg   | 96  | 53.6 | 49.0 | 9.3 | 81.5  | 30.1 | 8.4 | 30 |
| (2008) | NCT00  |              |     |      |      |     |       |      |     |    |
| [48]   | 337610 | PLA          | 94  | 56.1 | 58.5 | 9.1 | 81.2  | 30.4 | 7.3 | 30 |
| Xiao   |        | Glip: 5-10mg | 40  | 53.6 | 58.3 | 8.7 |       | 26.6 |     | 24 |
| (2015) | NA     | Piog:        |     |      |      |     | NA    |      | NA  |    |
| [49]   |        | 15-45mg      | 40  | 54.2 | 59.8 | 8.7 |       | 26.5 |     | 24 |

---

|          |        |            |     |      |      |      |      |       |       |    |
|----------|--------|------------|-----|------|------|------|------|-------|-------|----|
| Ohira    |        | Glim: 1mg  | 30  | 62.2 | 50   | 8.6  |      | 24.49 |       | 26 |
| (2014)   | NA     |            |     |      |      |      | NA   |       | NA    |    |
| [50]     |        | Piog: 15mg | 30  | 63.7 | 63.3 | 8.5  |      | 23.61 |       | 26 |
| Genovese |        | Piog       | 110 | 57   | 59.1 | 6.92 | 88.8 | 32.4  |       | 26 |
| (2013)   | NCT00  |            |     |      |      |      |      |       | 5.8   |    |
| [51]     | 772174 | PLA        | 103 | 57.8 | 60.2 | 7.02 | 89   | 32.6  | 5.7   | 26 |
| Pfutzner |        | Glim: 4mg  | 150 | 59   | 64.1 | 7.4  | 94.1 | 32.5  | 5.9   | 24 |
| (2011)   | NCT00  |            |     |      |      |      |      |       |       |    |
| [52]     | 770653 | Piog: 30mg | 155 | 59   | 64.1 | 7.1  | 96.2 | 32.6  | 6.2   | 24 |
| Petrica  |        | Glim: 4mg  | 39  | 58.8 | NA   | 7.49 | NA   | 33.71 | 10.17 | 52 |
| (2011)   | NA     |            |     |      |      |      |      |       |       |    |
| [53]     |        | Piog: 30mg | 39  | 56.8 | NA   | 7.7  | NA   | 32.1  | 10    | 52 |

---

|           |        |                         |     |      |      |      |      |       |       |    |
|-----------|--------|-------------------------|-----|------|------|------|------|-------|-------|----|
| Petrica   |        | Glim: 4mg               | 22  | 63.2 | 41.2 | 7.58 | NA   | 33.55 | 10.4  | 26 |
| (2009)    | NA     |                         |     |      |      |      |      |       |       |    |
| [54]      |        | Rosi <sup>r</sup> : 4mg | 22  | 63   | 41.2 | 7.72 | NA   | 33.58 | 10.53 | 26 |
| Khanolkar |        | Glic: 80mg              | 25  | 56   | 60   | 7.08 | NA   | 33.66 | NA    | 26 |
| (2008)    | NA     |                         |     |      |      |      |      |       |       |    |
| [55]      |        | Rosi: 4mg               | 25  | 59   | 56   | 7.33 | NA   | 34.55 | NA    | 26 |
| Kelly     |        | Glyb: 20mg              | 16  | 63.1 | 62.5 | 7.3  | 95   | NA    | NA    | 26 |
| (2007)    | NCT00  |                         |     |      |      |      |      |       |       |    |
| [56]      | 123643 | Rosi: 8mg               | 20  | 57.9 | 45   | 7.8  | 96.9 | NA    | NA    | 26 |
| Umpierrez |        | Glim: 2-8mg             | 101 | 51.6 | 55.2 | 8.41 | NA   | 34.54 | 4.9   | 28 |
| (2006)    | NA     |                         |     |      |      |      |      |       |       |    |
| [57]      |        | Piog:<br>30-45mg        | 109 | 55.7 | 52.3 | 8.31 | NA   | 33.81 | 5.9   | 28 |

---

|        |    |                     |     |      |      |      |      |      |      |    |
|--------|----|---------------------|-----|------|------|------|------|------|------|----|
| Ristic |    | Glic:80-240         | 129 | 61.6 | 50.4 | 7.6  | NA   | 29.5 | 6.7  | 24 |
| (2006) | NA | mg                  |     |      |      |      |      |      |      |    |
| [58]   |    | Nate <sup>o</sup> : | 133 | 62   | 54.2 | 7.67 | NA   | 28.5 | 7.16 | 24 |
|        |    | 180-540mg           |     |      |      |      |      |      |      |    |
| Garber |    | Glib <sup>k</sup> : | 160 | 56   | 56   | 8.5  | 93   | 32   | 5    | 24 |
| (2006) | NA | 5-10mg              |     |      |      |      |      |      |      |    |
| [59]   |    | Rosi: 4-8mg         | 158 | 56   | 65   | 8.4  | 94   | 32   | 6    | 24 |
| Bakris |    | Glyb: 5mg           | 185 | 58.8 | 69   | 8.3  | 90.3 | 31.8 | 7.6  | 32 |
| (2006) | NA |                     |     |      |      |      |      |      |      |    |
| [60]   |    | Rosi: 4mg           | 204 | 60   | 63   | 8.5  | 89.2 | 31.6 | 8    | 32 |
| Negro  | NA | Rosi: 8mg           | 19  | 60.3 | 52.6 | 8.4  | 84.1 | 28.3 | 7.1  | 52 |



---

|            |             |             |     |      |      |      |       |       |      |    |
|------------|-------------|-------------|-----|------|------|------|-------|-------|------|----|
| [64]       |             | PLA         | 43  | 62.3 | 76.7 | 7.82 | 87.88 | 30.09 | 6.06 | 24 |
| Halimi     |             | Acar: 100mg | 59  | 56   | 28   | 8.6  | NA    | 30.1  | 9.5  | 26 |
| (2000)     | NA          |             |     |      |      |      |       |       |      |    |
| [65]       |             | PLA         | 70  | 55   | 44   | 8.5  | NA    | 29.7  | 9    | 26 |
| Ferrannini |             | Empa: 10mg  | 166 | 60   | 50   | 7.88 | 89.6  | 30.2  | NA   | 78 |
| (2013)     | NCT00881530 | Empa: 25mg  | 166 | 60   | 53   | 7.91 | 89.5  | 30.3  | NA   | 78 |
| [66]       |             | Sita: 100mg | 56  | 60   | 51.8 | 8.03 | 88.6  | 30    | NA   | 78 |
| Blonde     |             | Cana: 100mg | 241 | 64.3 | 51.5 | 7.8  | 88.4  | 31.4  | 12.3 | 26 |
| (2016)     | NCT01106651 | Cana: 300mg | 236 | 63.4 | 54.7 | 7.7  | 88.8  | 31.5  | 11.3 | 26 |
| [67]       |             | PLA         | 237 | 63.2 | 60.3 | 7.8  | 91.1  | 31.8  | 11.4 | 52 |



|         |             |         |    |    |     |     |      |      |    |
|---------|-------------|---------|----|----|-----|-----|------|------|----|
| Dei Cas | Vild: 100mg | 40      | 61 | 65 | 7.7 | NA  | 29.1 | NA   | 52 |
| (2017)  | NCT01       |         |    |    |     |     |      |      |    |
| [68]    | 822548      | Glim:   | 24 | 63 | 71  | 7.7 | NA   | 28.9 | 52 |
|         |             | 2.5-5mg |    |    |     |     |      |      |    |

---

Note: <sup>a</sup>Dapa: Dapagliflozin; <sup>b</sup>Empa: Empagliflozin; <sup>c</sup>Cana: Canagliflozin; <sup>d</sup>Ipra: Ipragliflozin; <sup>e</sup>Vild: Vildagliptin; <sup>f</sup>Sita: Sitagliptin; <sup>g</sup>Saxa: Saxagliptin; <sup>h</sup>Lina: Linagliptin; <sup>i</sup>Alog: Alogliptin; <sup>j</sup>Tene: Teneligliptin; <sup>k</sup>Glib: Glyburide; <sup>l</sup>Glic: Gliclazide; <sup>m</sup>Glim: Glimepiride; <sup>n</sup>Glip: Glipizide; <sup>o</sup>Nate: Nateglinide; <sup>p</sup>Acar: Acarbose; <sup>q</sup>Piog: Pioglitazone; <sup>r</sup>Rosi: Rosiglitazone; <sup>s</sup>PLA: Placebo. <sup>t</sup>BMI: body mass index; <sup>u</sup>HbA1c: glycated hemoglobin; <sup>v</sup>NA: not applicable.

**Table S3.** Assessment of risk of bias in individual studies

| <b>Study</b>                | <b>Sequence<br/>Generation</b> | <b>Allocation<br/>Concealment</b> | <b>Blinding of<br/>Participants<br/>and Personnel</b> | <b>Blinding of<br/>Outcome<br/>Assessment</b> | <b>Incomplete<br/>Outcome<br/>Data</b> | <b>Selective<br/>Reporting</b> |
|-----------------------------|--------------------------------|-----------------------------------|-------------------------------------------------------|-----------------------------------------------|----------------------------------------|--------------------------------|
| Bolinder<br>(2014) [1]      | Low                            | Unclear                           | Low                                                   | Unclear                                       | High                                   | Low                            |
| Baily (2013)<br>[2]         | Low                            | Low                               | Low                                                   | Unclear                                       | Low                                    | Low                            |
| Lava-Gonzalez<br>(2013) [3] | Low                            | Unclear                           | Low                                                   | Unclear                                       | Low                                    | Low                            |
| Rosenstock<br>(2015) [4]    | Unclear                        | Unclear                           | Low                                                   | Unclear                                       | Low                                    | Low                            |
| Del Prato<br>(2015) [5]     | Low                            | Low                               | Low                                                   | Unclear                                       | Low                                    | Low                            |
| Merker (2015)<br>[6]        | Low                            | Low                               | Low                                                   | Unclear                                       | Low                                    | Low                            |
| BOSI (2007)<br>[7]          | Unclear                        | Unclear                           | Low                                                   | Unclear                                       | High                                   | Low                            |
| Bryson (2016)               | Low                            | Low                               | Low                                                   | Unclear                                       | High                                   | Low                            |

---

|                           |         |         |     |         |      |     |
|---------------------------|---------|---------|-----|---------|------|-----|
| [8]                       |         |         |     |         |      |     |
| Charbonnel<br>(2006) [9]  | Unclear | Unclear | Low | Unclear | High | Low |
| Ahren (2004)<br>[10]      | Unclear | Unclear | Low | Unclear | High | Low |
| Handelsman<br>(2017) [11] | Low     | Unclear | Low | Unclear | High | Low |
| Gadde (2017)<br>[12]      | Low     | Low     | Low | Unclear | Low  | Low |
| Du (2017) [13]            | Low     | Unclear | Low | Unclear | High | Low |
| Yang (2016)<br>[14]       | Low     | Unclear | Low | Unclear | High | Low |
| Lu (2016) [15]            | Low     | Low     | Low | Unclear | Low  | Low |
| Tai (2016)<br>[16]        | Low     | Unclear | Low | Unclear | High | Low |
| DeFronzo<br>(2015) [17]   | Low     | Low     | Low | Unclear | High | Low |
| Ji (2016) [18]            | Low     | Unclear | Low | Unclear | High | Low |
| Wang (2016)               | Low     | Low     | Low | Low     | Low  | Low |

---

|                              |         |         |         |         |         |      |
|------------------------------|---------|---------|---------|---------|---------|------|
| [19]                         |         |         |         |         |         |      |
| Wang (2015)                  | Unclear | Unclear | Unclear | Unclear | Low     | High |
| [20]                         |         |         |         |         |         |      |
| Schernthaler<br>(2015) [21]  | Low     | Low     | Low     | Unclear | High    | Low  |
| Ridderstrale<br>(2014) [22]  | Low     | Low     | Low     | Unclear | High    | Low  |
| Del Prato<br>(2014) [23]     | Unclear | Unclear | Low     | Low     | High    | Low  |
| Derosa (2014)<br>[24]        | Unclear | Unclear | Low     | Unclear | High    | High |
| Kashiwagi<br>(2015) [25]     | Unclear | Unclear | Low     | Unclear | Low     | Low  |
| Cefalu (2013)<br>[26]        | Low     | Low     | Low     | Unclear | Low     | Low  |
| Berndt-Zipfel<br>(2013) [27] | Unclear | Unclear | High    | Unclear | Unclear | High |
| Yang (2012)<br>[28]          | Low     | Unclear | Low     | Unclear | Low     | Low  |

---

|                          |         |         |      |         |      |      |
|--------------------------|---------|---------|------|---------|------|------|
| Gallwitz<br>(2012) [29]  | Low     | Low     | Low  | Unclear | High | Low  |
| Derosa (2012)<br>[30]    | Low     | Unclear | Low  | Unclear | Low  | High |
| Derosa- a<br>(2012) [31] | Unclear | Unclear | Low  | Unclear | Low  | High |
| Yang (2011)<br>[32]      | Low     | Unclear | Low  | Unclear | High | Low  |
| Bergental<br>(2012) [33] | Unclear | Low     | Low  | Unclear | High | Low  |
| Pan (2012)<br>[34]       | Unclear | Unclear | Low  | Unclear | Low  | High |
| Jeon (2011)<br>[35]      | Unclear | Unclear | High | Unclear | Low  | High |
| Seck (2010)<br>[36]      | Unclear | Unclear | Low  | Unclear | High | Low  |
| Goke (2010)<br>[37]      | Low     | Low     | Low  | Unclear | High | Low  |
| Matthews                 | Unclear | Unclear | Low  | Unclear | High | Low  |

---

|                             |         |         |     |         |         |      |
|-----------------------------|---------|---------|-----|---------|---------|------|
| (2010) [38]                 |         |         |     |         |         |      |
| Filozof (2010)<br>[39]      | Unclear | Unclear | Low | Low     | High    | Low  |
| Filozof-a<br>(2010) [40]    | Unclear | Unclear | Low | Low     | Low     | High |
| Arechavaleta<br>(2011) [41] | Low     | Unclear | Low | Unclear | High    | Low  |
| Taskinen<br>(2011) [42]     | Unclear | Unclear | Low | Unclear | Low     | High |
| Goodman<br>(2009) [43]      | Unclear | Unclear | Low | Unclear | Low     | Low  |
| Bergental<br>(2010) [44]    | Low     | Low     | Low | Unclear | High    | Low  |
| Nauck (2009)<br>[45]        | Low     | Low     | Low | Unclear | High    | Low  |
| DeFronzo<br>(2009) [46]     | Low     | Low     | Low | Unclear | High    | Low  |
| Bolli (2009)<br>[47]        | Unclear | Low     | Low | Unclear | Unclear | Low  |

---

|                          |         |         |      |         |      |      |
|--------------------------|---------|---------|------|---------|------|------|
| Raz (2008)<br>[48]       | Low     | Unclear | Low  | Unclear | Low  | Low  |
| Xiao (2015)<br>[49]      | Low     | Unclear | High | Unclear | Low  | High |
| Ohira (2014)<br>[50]     | Unclear | Low     | High | Unclear | Low  | High |
| Genovese<br>(2013) [51]  | Unclear | Unclear | Low  | Unclear | Low  | High |
| Pfutzner<br>(2011) [52]  | Unclear | Unclear | Low  | Unclear | High | High |
| Petrica (2011)<br>[53]   | Unclear | Unclear | High | Unclear | Low  | High |
| Petrica (2009)<br>[54]   | Unclear | Unclear | High | High    | Low  | High |
| Khanolkar<br>(2008) [55] | Unclear | Unclear | High | Unclear | Low  | High |
| Kelly (2007)<br>[56]     | Unclear | Unclear | Low  | Unclear | Low  | Low  |
| Umpierrez                | Unclear | Unclear | High | Unclear | High | Low  |

---

|                           |         |         |      |         |         |      |
|---------------------------|---------|---------|------|---------|---------|------|
| (2006) [57]               |         |         |      |         |         |      |
| Ristic (2006)<br>[58]     | Low     | Low     | Low  | Unclear | High    | High |
| Garber (2006)<br>[59]     | Unclear | Unclear | Low  | Unclear | High    | High |
| Bakris (2006)<br>[60]     | Unclear | Unclear | Low  | Unclear | High    | High |
| Negro (2005)<br>[61]      | Unclear | Unclear | High | Unclear | Unclear | High |
| Matthews<br>(2005) [62]   | Unclear | Unclear | Low  | Unclear | High    | Low  |
| Derosa (2005)<br>[63]     | Unclear | Unclear | Low  | Unclear | Low     | High |
| Phillips (2003)<br>[64]   | Unclear | Unclear | Low  | Unclear | Low     | Low  |
| Halimi (2000)<br>[65]     | Unclear | Unclear | Low  | Unclear | High    | High |
| Ferrannini<br>(2013) [66] | Unclear | Unclear | Low  | Unclear | Low     | Low  |



---

Blonde (2016)

[67]

Unclear

Unclear

Low

Unclear

Low

Low

Dei Cas

(2017) [68]

Unclear

Unclear

Low

Unclear

Low

Low

---

**Table S4.** Assessment of loop inconsistency in networks

| <b>Loop</b>                                               | <b>Inconsistency factor</b> | <b>95% confidence interval</b> | <b>P-value</b> | <b>Loop heterogeneity tau<sup>2</sup></b> |
|-----------------------------------------------------------|-----------------------------|--------------------------------|----------------|-------------------------------------------|
| <b>HbA1c<sup>a</sup></b>                                  |                             |                                |                |                                           |
| PLA <sup>k</sup> -DPP4 <sup>g</sup> -AGI <sup>h</sup>     | 0.43                        | 0.06-0.81                      | 0.024          | 0.021                                     |
| PLA-SGLT2 <sup>f</sup> -SU <sup>j</sup> -TZD <sup>i</sup> | 0.23                        | 0.00-0.81                      | 0.497          | 0.041                                     |
| SGLT2-DPP4-SU                                             | 0.10                        | 0.00-0.30                      | 0.30           | 0.009                                     |
| PLA-SGLT2-DPP4                                            | 0.08                        | 0.00-0.36                      | 0.572          | 0.028                                     |
| DPP4-SU-TZD                                               | 0.06                        | 0.00-0.37                      | 0.710          | 0.016                                     |
| PLA-DPP4-TZD                                              | 0.02                        | 0.00-0.53                      | 0.932          | 0.033                                     |
| <b>2h-PPG<sup>b</sup></b>                                 |                             |                                |                |                                           |
| PLA-SGLT2-DPP4                                            | 1.10                        | 0.00-3.65                      | 0.396          | 0.468                                     |
| PLA-DPP4-TZD                                              | 0.44                        | 0.00-3.32                      | 0.737          | 0.468                                     |
| <b>FPG<sup>c</sup></b>                                    |                             |                                |                |                                           |
| PLA-DPP4-AGI                                              | 0.49                        | 0.00-1.10                      | 0.122          | 0.056                                     |
| DPP4-SU-TZD                                               | 0.40                        | 0.00-1.10                      | 0.260          | 0.099                                     |
| PLA-SGLT2-DPP4                                            | 0.34                        | 0.00-0.74                      | 0.098          | 0.053                                     |
| SGLT2-DPP4-SU                                             | 0.09                        | 0.00-0.68                      | 0.769          | 0.084                                     |
| <b>Body weight</b>                                        |                             |                                |                |                                           |
| PLA-SGLT2-DPP4                                            | 0.82                        | 0.00-1.65                      | 0.052          | 0.132                                     |
| PLA-SGLT2-SU-TZD                                          | 0.45                        | 0.00-3.33                      | 0.758          | 0.152                                     |
| DPP4-SU-TZD                                               | 0.56                        | 0.00-1.62                      | 0.290          | 0.101                                     |

|                              |      |           |       |       |
|------------------------------|------|-----------|-------|-------|
| PLA-DPP4-TZD                 | 0.21 | 0.00-3.00 | 0.882 | 0.140 |
| SGLT2-DPP4-SU                | 0.12 | 0.00-0.70 | 0.679 | 0.027 |
| PLA-DPP4-AGI                 | 0.09 | 0.00-1.91 | 0.921 | 0.130 |
| <b>All-cause mortality</b>   |      |           |       |       |
| PLA-SGLT2-DPP4               | 0.94 | 0.00-3.57 | 0.486 | 0.000 |
| SGLT2-DPP4-SU                | 0.02 | 0.00-2.16 | 0.982 | 0.000 |
| <b>MACE<sup>d</sup></b>      |      |           |       |       |
| DPP4-SU-TZD                  | 1.13 | 0.00-4.78 | 0.544 | 0.000 |
| PLA-SGLT2-DPP4               | 0.38 | 0.00-2.23 | 0.693 | 0.000 |
| SGLT2-DPP4-SU                | 0.00 | 0.00-1.62 | 0.999 | 0.000 |
| <b>Serious adverse event</b> |      |           |       |       |
| PLA-SGLT2-SU-TZD             | 1.10 | 0.00-3.56 | 0.377 | 0.063 |
| DPP4-SU-TZD                  | 0.62 | 0.00-1.39 | 0.118 | 0.003 |
| SGLT2-DPP4-SU                | 0.48 | 0.00-1.04 | 0.094 | 0.028 |
| PLA-DPP4-TZD                 | 0.28 | 0.00-2.66 | 0.818 | 0.000 |
| PLA-SGLT2-DPP4               | 0.25 | 0.00-0.87 | 0.467 | 0.000 |
| <b>Hypoglycemia</b>          |      |           |       |       |
| DPP4-SU-TZD                  | 1.76 | 0.00-4.15 | 0.150 | 0.149 |
| SGLT2-DPP4-SU                | 0.41 | 0.00-1.37 | 0.403 | 0.146 |
| PLA-SGLT2-DPP4               | 0.04 | 0.00-0.88 | 0.929 | 0.000 |
| <b>UTI<sup>e</sup></b>       |      |           |       |       |
| SGLT2-DPP4-SU                | 0.43 | 0.00-1.11 | 0.220 | 0.068 |

|                |      |           |       |       |
|----------------|------|-----------|-------|-------|
| PLA-SGLT2-DPP4 | 0.08 | 0.00-0.69 | 0.781 | 0.000 |
|----------------|------|-----------|-------|-------|

**Diarrhea**

|                |      |           |       |       |
|----------------|------|-----------|-------|-------|
| SGLT2-DPP4-SU  | 1.16 | 0.00-2.89 | 0.191 | 0.000 |
| PLA-SGLT2-DPP4 | 0.60 | 0.00-2.81 | 0.592 | 0.501 |
| DPP4-SU-TZD    | 0.12 | 0.00-0.97 | 0.775 | 0.000 |

---

Note: <sup>a</sup>HbA1c, glycated hemoglobin; <sup>b</sup>2h-PPG, 2-h postprandial glucose; <sup>c</sup>FPG, fasting plasma glucose; <sup>d</sup>MACE, major adverse cardiovascular event; <sup>e</sup>UTI, urinary tract infection. <sup>f</sup>SGLT2, sodium-glucose co-transporter-2 inhibitor; <sup>g</sup>DPP4, dipeptidyl peptidase-4 inhibitor; <sup>h</sup>AGI, alpha-glucosidase inhibitor; <sup>i</sup>TZD, thiazolidinedione; <sup>j</sup>SU, sulfonylurea; <sup>k</sup>PLA, placebo.

**Table S5.** Assessment of global inconsistency in networks using the ‘design-by-treatment’ interaction model

| <b>Network outcome</b> | <b>Chi square</b> | <b>P value for test of global inconsistency</b> |
|------------------------|-------------------|-------------------------------------------------|
| HbA1c <sup>a</sup>     | 7.31              | 0.1987                                          |
| 2h-PPG <sup>b</sup>    | 1.12              | 0.5720                                          |
| FPG <sup>c</sup>       | 8.00              | 0.0914                                          |
| Body weight            | 7.36              | 0.1949                                          |
| All-cause mortality    | 0.74              | 0.6909                                          |
| MACE <sup>d</sup>      | 0.6               | 0.8974                                          |
| Hypoglycemia           | 3.82              | 0.2814                                          |
| Serious adverse event  | 5.65              | 0.2267                                          |
| UTI <sup>e</sup>       | 1.57              | 0.4558                                          |
| Diarrhea               | 3.29              | 0.3496                                          |

Note: <sup>a</sup>HbA1c, glycated hemoglobin; <sup>b</sup>2h-PPG, 2-h postprandial glucose; <sup>c</sup>FPG, fasting plasma glucose; <sup>d</sup>MACE, major adverse cardiovascular event; <sup>e</sup>UTI, urinary tract infection.

**Table S6.** Pairwise random-effects meta-analyses for efficacy and safety outcomes

| Drug A                   | Drug B    | No. of trials | No. of participants | OR / WMD (95% CI)     | Heterogeneity I <sup>2</sup> (%) |
|--------------------------|-----------|---------------|---------------------|-----------------------|----------------------------------|
| <b>HbA1c<sup>a</sup></b> |           |               |                     |                       |                                  |
| SGLT-2 inhibitor         | PLA       | 7             | 2841                | -0.66<br>(-0.85-0.48) | 83                               |
| DPP-4 inhibitor          | PLA       | 17            | 6556                | -0.64<br>(-0.73-0.55) | 72                               |
| AGI                      | PLA       | 2             | 210                 | -1.02<br>(-1.09-0.94) | 0                                |
| TZD                      | PLA       | 2             | 251                 | -0.86<br>(-1.69-0.03) | 94                               |
| DPP-4 inhibitor          | Met       | 3             | 3980                | -0.17<br>(-0.21-0.14) | 0                                |
| SU                       | Glitinide | 1             | 247                 | -0.16<br>(-0.38,0.06) | /                                |
| DPP-4 inhibitor          | AGI       | 2             | 562                 | -0.10<br>(-0.19,0.00) | 0                                |
| SGLT-2 inhibitor         | SU        | 3             | 3771                | -0.12<br>(-0.21-0.02) | 50                               |
| SU                       | TZD       | 11            | 1908                | 0.03<br>(-0.13,0.20)  | 69                               |

**2h-PPG<sup>b</sup>**

|           |           |    |       |              |    |
|-----------|-----------|----|-------|--------------|----|
| DPP-4     | SU        | 12 | 10374 | 0.06         | 71 |
| inhibitor |           |    |       | (-0.01,0.13) |    |
| DPP-4     | TZD       | 2  | 892   | 0.14         | 71 |
| inhibitor |           |    |       | (-0.16,0.44) |    |
| SGLT-2    | DPP-4     | 4  | 2126  | -0.09        | 58 |
| inhibitor | inhibitor |    |       | (-0.23,0.04) |    |
| SGLT-2    | PLA       | 1  | 358   | -2.55        | /  |
| inhibitor |           |    |       | (-3.09-2.01) |    |
| DPP-4     | PLA       | 7  | 2384  | -1.76        | 86 |
| inhibitor |           |    |       | (-2.35-1.18) |    |
| AGI       | PLA       | 1  | 129   | -2.50        | /  |
|           |           |    |       | (-3.77-1.23) |    |
| SGLT-2    | DPP-4     | 1  | 291   | -1.89        | /  |
| inhibitor | inhibitor |    |       | (-2.43-1.35) |    |
| DPP-4     | Met       | 1  | 81    | -0.21        | /  |
| inhibitor |           |    |       | (-0.61,0.19) |    |
| DPP-4     | SU        | 3  | 703   | -0.06        | 42 |
| inhibitor |           |    |       | (-0.57,0.45) |    |
| DPP-4     | AGI       | 1  | 478   | 0.30         | /  |
| inhibitor |           |    |       | (-0.19,0.79) |    |
| SU        | TZD       | 1  | 95    | 0.33         |    |

**FPG<sup>c</sup>**

|           |           |    |       |       |              |    |
|-----------|-----------|----|-------|-------|--------------|----|
|           |           |    |       |       | (-0.12,0.78) |    |
| SGLT-2    | PLA       | 7  | 2841  | -1.32 |              | 67 |
| inhibitor |           |    |       |       | (-1.57-1.06) |    |
| DPP-4     | PLA       | 16 | 6099  | -0.97 |              | 64 |
| inhibitor |           |    |       |       | (-1.13-0.82) |    |
| AGI       | PLA       | 2  | 210   | -1.62 |              | 81 |
|           |           |    |       |       | (-2.74-0.50) |    |
| SGLT-2    | DPP-4     | 4  | 2324  | -0.68 |              | 38 |
| inhibitor | inhibitor |    |       |       | (-0.91-0.46) |    |
| DPP-4     | Met       | 2  | 995   | -0.68 |              | 38 |
| inhibitor |           |    |       |       | (-1.65,0.29) |    |
| SGLT-2    | SU        | 2  | 2346  | -0.65 |              | 0  |
| inhibitor |           |    |       |       | (-0.81-0.49) |    |
| SU        | Glitinide | 1  | 247   | -0.19 |              | /  |
|           |           |    |       |       | (-0.68,0.30) |    |
| DPP-4     | AGI       | 2  | 562   | -0.15 |              | 24 |
| inhibitor |           |    |       |       | (-0.36,0.06) |    |
| SU        | TZD       | 6  | 1428  | 0.03  |              | 58 |
|           |           |    |       |       | (-0.33,0.40) |    |
| DPP-4     | SU        | 13 | 12116 | 0.18  |              | 82 |
| inhibitor |           |    |       |       | (-0.03,0.38) |    |



|           |     |   |     |             |   |
|-----------|-----|---|-----|-------------|---|
| DPP-4     | TZD | 2 | 889 | 0.60        | 0 |
| inhibitor |     |   |     | (0.25,0.96) |   |

**Body weight**

|           |     |   |      |              |    |
|-----------|-----|---|------|--------------|----|
| SGLT-2    | PLA | 7 | 2848 | -1.97        | 63 |
| inhibitor |     |   |      | (-2.37-1.56) |    |

|           |     |    |      |              |    |
|-----------|-----|----|------|--------------|----|
| DPP-4     | PLA | 10 | 3035 | -0.29        | 62 |
| inhibitor |     |    |      | (-0.61,0.03) |    |

|     |     |   |    |              |   |
|-----|-----|---|----|--------------|---|
| AGI | PLA | 1 | 81 | -0.89        | / |
|     |     |   |    | (-2.05,0.27) |   |

|     |     |   |     |             |   |
|-----|-----|---|-----|-------------|---|
| TZD | PLA | 2 | 251 | 2.40        | 0 |
|     |     |   |     | (0.01,4.79) |   |

|           |    |   |      |              |   |
|-----------|----|---|------|--------------|---|
| SGLT-2    | SU | 3 | 3783 | -4.47        | 0 |
| inhibitor |    |   |      | (-4.75-4.20) |   |

|           |           |   |      |              |   |
|-----------|-----------|---|------|--------------|---|
| SGLT-2    | DPP-4     | 3 | 1962 | -2.41        | 0 |
| inhibitor | inhibitor |   |      | (-2.78-2.04) |   |

|           |    |    |       |              |    |
|-----------|----|----|-------|--------------|----|
| DPP-4     | SU | 11 | 11338 | -1.94        | 43 |
| inhibitor |    |    |       | (-2.15-1.73) |    |

|    |     |   |      |              |    |
|----|-----|---|------|--------------|----|
| SU | TZD | 5 | 1020 | -0.26        | 64 |
|    |     |   |      | (-1.23,0.70) |    |

|           |     |   |      |             |   |
|-----------|-----|---|------|-------------|---|
| DPP-4     | Met | 1 | 3192 | 0.51        | / |
| inhibitor |     |   |      | (0.28,0.74) |   |

|       |     |   |     |      |   |
|-------|-----|---|-----|------|---|
| DPP-4 | AGI | 1 | 481 | 0.69 | / |
|-------|-----|---|-----|------|---|

|                            |           |    |       |  |              |    |
|----------------------------|-----------|----|-------|--|--------------|----|
| inhibitor                  |           |    |       |  | (0.19,1.19)  |    |
| DPP-4                      | TZD       | 2  | 898   |  | -2.95        | 75 |
| inhibitor                  |           |    |       |  | (-4.08-1.81) |    |
| <b>All-cause mortality</b> |           |    |       |  |              |    |
| SGLT-2                     | PLA       | 5  | 1977  |  | 0.87         | 0  |
| inhibitor                  |           |    |       |  | (0.13,5.97)  |    |
| DPP-4                      | PLA       | 10 | 4050  |  | 0.29         | 0  |
| inhibitor                  |           |    |       |  | (0.05,1.87)  |    |
| SGLT-2                     | SU        | 3  | 3809  |  | 0.67         | 0  |
| inhibitor                  |           |    |       |  | (0.28,1.63)  |    |
| SGLT-2                     | DPP-4     | 3  | 1861  |  | 0.77         | 0  |
| inhibitor                  | inhibitor |    |       |  | (0.09,6.30)  |    |
| DPP-4                      | SU        | 9  | 12805 |  | 0.80         | 0  |
| inhibitor                  |           |    |       |  | (0.45,1.43)  |    |
| SU                         | TZD       | 2  | 887   |  | 2.44         | 0  |
|                            |           |    |       |  | (0.21,27.86) |    |
| SU                         | Glitinide | 1  | 256   |  | 1.03         | /  |
|                            |           |    |       |  | (0.02,52.38) |    |
| DPP-4                      | AGI       | 1  | 461   |  | 1.00         | /  |
| inhibitor                  |           |    |       |  | (0.02,50.39) |    |
| DPP-4                      | Met       | 2  | 3167  |  | 0.42         | 0  |
| inhibitor                  |           |    |       |  | (0.03,6.76)  |    |

**MACE<sup>d</sup>**

|                  |                 |   |      |             |   |
|------------------|-----------------|---|------|-------------|---|
| SGLT-2 inhibitor | PLA             | 6 | 2699 | 0.49        | 0 |
|                  |                 |   |      | (0.20,1.16) |   |
| DPP-4 inhibitor  | PLA             | 9 | 4468 | 0.64        | 0 |
|                  |                 |   |      | (0.25,1.67) |   |
| DPP-4 inhibitor  | TZD             | 2 | 908  | 0.42        | 0 |
|                  |                 |   |      | (0.06,3.00) |   |
| SU               | TZD             | 1 | 290  | 0.34        | / |
|                  |                 |   |      | (0.03,3.29) |   |
| DPP-4 inhibitor  | SU              | 8 | 8771 | 0.69        | 0 |
|                  |                 |   |      | (0.45,1.06) |   |
| SGLT-2 inhibitor | SU              | 3 | 3809 | 0.73        | 0 |
|                  |                 |   |      | (0.32,1.67) |   |
| SGLT-2 inhibitor | DPP-4 inhibitor | 4 | 2253 | 0.99        | 0 |
|                  |                 |   |      | (0.20,4.82) |   |

**Serious adverse event**

|                  |     |    |      |              |   |
|------------------|-----|----|------|--------------|---|
| SGLT-2 inhibitor | PLA | 7  | 2861 | 0.77         | 0 |
|                  |     |    |      | (0.57,1.05)  |   |
| DPP-4 inhibitor  | PLA | 14 | 6181 | 0.97         | 0 |
|                  |     |    |      | (0.69,1.36)  |   |
| TZD              | PLA | 1  | 213  | 2.86         | / |
|                  |     |    |      | (0.29,27.94) |   |

|           |           |    |       |              |    |
|-----------|-----------|----|-------|--------------|----|
| DPP-4     | TZD       | 2  | 906   | 0.45         | 0  |
| inhibitor |           |    |       | (0.25,0.81)  |    |
| DPP-4     | Met       | 3  | 4081  | 0.68         | 49 |
| inhibitor |           |    |       | (0.10,4.80)  |    |
| DPP-4     | SU        | 11 | 12971 | 0.97         | 16 |
| inhibitor |           |    |       | (0.85,1.11)  |    |
| DPP-4     | AGI       | 1  | 461   | 2.52         | /  |
| inhibitor |           |    |       | (0.48,13.13) |    |
| SGLT-2    | DPP-4     | 4  | 2249  | 0.63         | 0  |
| inhibitor | inhibitor |    |       | (0.41,0.95)  |    |
| SGLT-2    | SU        | 3  | 3809  | 0.95         | 81 |
| inhibitor |           |    |       | (0.59,1.52)  |    |
| SU        | TZD       | 4  | 1282  | 0.81         | 49 |
|           |           |    |       | (0.41,1.61)  |    |

### Hypoglycemia

|           |     |    |       |             |    |
|-----------|-----|----|-------|-------------|----|
| SGLT-2    | PLA | 7  | 2861  | 0.79        | 0  |
| inhibitor |     |    |       | (0.56,1.12) |    |
| DPP-4     | PLA | 14 | 6181  | 0.58        | 0  |
| inhibitor |     |    |       | (0.33,1.01) |    |
| DPP-4     | SU  | 10 | 11968 | 0.11        | 75 |
| inhibitor |     |    |       | (0.08,0.15) |    |
| DPP-4     | Met | 3  | 4081  | 0.68        | 0  |

|           |           |   |      |      |              |  |
|-----------|-----------|---|------|------|--------------|--|
| inhibitor |           |   |      |      | (0.33,1.49)  |  |
| DPP-4     | AGI       | 1 | 461  | 0.74 | /            |  |
| inhibitor |           |   |      |      | (0.16,3.36)  |  |
| DPP-4     | TZD       | 1 | 331  | 5.09 | /            |  |
| inhibitor |           |   |      |      | (0.59,44.08) |  |
| SU        | TZD       | 4 | 1489 | 7.75 | 60.4         |  |
|           |           |   |      |      | (5.10,11.76) |  |
| SGLT-2    | SU        | 3 | 3809 | 0.09 | 76           |  |
| inhibitor |           |   |      |      | (0.06,0.15)  |  |
| SGLT-2    | DPP-4     | 4 | 2249 | 1.45 | 0            |  |
| inhibitor | inhibitor |   |      |      | (0.85,2.48)  |  |
| SU        | Glitinide | 1 | 256  | 1.04 | /            |  |
|           |           |   |      |      | (0.58,1.88)  |  |

**UTI<sup>e</sup>**

|           |           |   |      |      |             |  |
|-----------|-----------|---|------|------|-------------|--|
| SGLT-2    | PLA       | 6 | 2693 | 1.16 | 0           |  |
| inhibitor |           |   |      |      | (0.83,1.63) |  |
| DPP-4     | PLA       | 9 | 4127 | 1.13 | 0           |  |
| inhibitor |           |   |      |      | (0.81,1.59) |  |
| SGLT-2    | SU        | 3 | 3809 | 1.24 | 44          |  |
| inhibitor |           |   |      |      | (0.90,1.70) |  |
| SGLT-2    | DPP-4     | 4 | 2249 | 0.93 | 0           |  |
| inhibitor | inhibitor |   |      |      | (0.66,1.31) |  |

|           |     |   |      |             |    |
|-----------|-----|---|------|-------------|----|
| DPP-4     | SU  | 6 | 7725 | 0.86        | 73 |
| inhibitor |     |   |      | (0.54,1.36) |    |
| DPP-4     | AGI | 1 | 463  | 1.51        | /  |
| inhibitor |     |   |      | (0.53,4.32) |    |
| DPP-4     | TZD | 1 | 331  | 1.52        | /  |
| inhibitor |     |   |      | (0.53,4.37) |    |

**Diarrhea**

|                  |                  |    |       |             |    |
|------------------|------------------|----|-------|-------------|----|
| SGLT-2           | PLA              | 5  | 2523  | 0.95        | 0  |
| inhibitor        |                  |    |       | (0.64,1.43) |    |
| DPP-4            | PLA              | 11 | 4965  | 0.72        | 67 |
| inhibitor        |                  |    |       | (0.38,1.33) |    |
| AGI <sup>h</sup> | PLA <sup>l</sup> | 1  | 83    | 1.09        | /  |
|                  |                  |    |       | (0.32,3.70) |    |
| DPP-4            | Met <sup>j</sup> | 1  | 914   | 0.52        | /  |
| inhibitor        |                  |    |       | (0.30,0.90) |    |
| DPP-4            | SU               | 9  | 11875 | 0.97        | 0  |
| inhibitor        |                  |    |       | (0.83,1.13) |    |
| DPP-4            | TZD              | 2  | 906   | 1.13        | 0  |
| inhibitor        |                  |    |       | (0.65,1.95) |    |
| SU               | TZD <sup>i</sup> | 2  | 616   | 1.29        | 0  |
|                  |                  |    |       | (0.68,2.43) |    |
| SGLT-2           | SU <sup>k</sup>  | 2  | 2359  | 0.79        | 0  |

|                        |                        |   |     |      |              |    |
|------------------------|------------------------|---|-----|------|--------------|----|
| inhibitor              |                        |   |     |      | (0.58,1.09)  |    |
| SGLT-2                 | DPP-4                  | 2 | 795 | 2.85 |              | 37 |
| inhibitor <sup>f</sup> | inhibitor <sup>g</sup> |   |     |      | (0.32,25.64) |    |

---

Note: <sup>a</sup>HbA1c, glycated hemoglobin; <sup>b</sup>2h-PPG, 2-h postprandial glucose; <sup>c</sup>FPG, fasting plasma glucose; <sup>d</sup>MACE, major adverse cardiovascular event; <sup>e</sup>UTI, urinary tract infection; <sup>f</sup>SGLT-2 inhibitor, sodium-glucose co-transporter-2 inhibitor; <sup>g</sup>DPP-4 inhibitor, dipeptidyl peptidase-4 inhibitor; <sup>h</sup>AGI,  $\alpha$ -glucosidase inhibitor; <sup>i</sup>TZD, thiazolidinedione; <sup>j</sup>Met, high dose metformin; <sup>k</sup>SU, sulfonylurea; <sup>l</sup>PLA, placebo.

**Table S7.** Contributions of direct evidence in the entire network

| <b>Drug A</b>             | <b>Drug B</b>   | <b>No. of trials</b> | <b>Contribution to the network, %</b> |
|---------------------------|-----------------|----------------------|---------------------------------------|
| <b>HbA1c<sup>a</sup></b>  |                 |                      |                                       |
| SGLT-2 inhibitor          | PLA             | 7                    | 4.4                                   |
| DPP-4 inhibitor           | PLA             | 17                   | 9.4                                   |
| AGI                       | PLA             | 2                    | 8.9                                   |
| TZD                       | PLA             | 2                    | 0.5                                   |
| DPP-4 inhibitor           | Met             | 3                    | 11.1                                  |
| SU                        | Glitinide       | 1                    | 11.1                                  |
| DPP-4 inhibitor           | AGI             | 2                    | 9.1                                   |
| SGLT-2 inhibitor          | SU              | 3                    | 10.0                                  |
| SU                        | TZD             | 11                   | 8.9                                   |
| DPP-4 inhibitor           | SU              | 12                   | 18.0                                  |
| DPP-4 inhibitor           | TZD             | 2                    | 3.1                                   |
| SGLT-2 inhibitor          | DPP-4 inhibitor | 4                    | 5.6                                   |
| <b>2h-PPG<sup>b</sup></b> |                 |                      |                                       |
| SGLT-2 inhibitor          | PLA             | 1                    | 9.5                                   |



|                        |                 |    |      |
|------------------------|-----------------|----|------|
| DPP-4 inhibitor        | PLA             | 7  | 10.8 |
| AGI                    | PLA             | 1  | 3.5  |
| SGLT-2 inhibitor       | DPP-4 inhibitor | 1  | 12.4 |
| DPP-4 inhibitor        | Met             | 1  | 13.8 |
| DPP-4 inhibitor        | SU              | 3  | 23.0 |
| DPP-4 inhibitor        | AGI             | 1  | 13.4 |
| SU                     | TZD             | 1  | 13.8 |
| <b>FPG<sup>c</sup></b> |                 |    |      |
| SGLT-2 inhibitor       | PLA             | 7  | 6.8  |
| DPP-4 inhibitor        | PLA             | 16 | 11.5 |
| AGI                    | PLA             | 2  | 0.6  |
| SGLT-2 inhibitor       | DPP-4 inhibitor | 4  | 8.1  |
| DPP-4 inhibitor        | Met             | 2  | 11.3 |
| SGLT-2 inhibitor       | SU              | 2  | 13.1 |
| SU                     | Glitinide       | 1  | 11.3 |
| DPP-4 inhibitor        | AGI             | 2  | 11.1 |
| SU                     | TZD             | 6  | 6.9  |
| DPP-4 inhibitor        | SU              | 13 | 11.8 |

|                 |     |   |     |
|-----------------|-----|---|-----|
| DPP-4 inhibitor | TZD | 2 | 7.5 |
|-----------------|-----|---|-----|

**Body weight**

|        |     |   |     |
|--------|-----|---|-----|
| SGLT-2 | PLA | 7 | 8.2 |
|--------|-----|---|-----|

inhibitor

|                 |     |    |      |
|-----------------|-----|----|------|
| DPP-4 inhibitor | PLA | 10 | 11.3 |
|-----------------|-----|----|------|

|     |     |   |     |
|-----|-----|---|-----|
| AGI | PLA | 1 | 2.9 |
|-----|-----|---|-----|

|     |     |   |     |
|-----|-----|---|-----|
| TZD | PLA | 2 | 1.4 |
|-----|-----|---|-----|

|        |    |   |      |
|--------|----|---|------|
| SGLT-2 | SU | 3 | 11.6 |
|--------|----|---|------|

inhibitor

|        |                 |   |     |
|--------|-----------------|---|-----|
| SGLT-2 | DPP-4 inhibitor | 3 | 7.3 |
|--------|-----------------|---|-----|

inhibitor

|                 |    |    |      |
|-----------------|----|----|------|
| DPP-4 inhibitor | SU | 11 | 17.0 |
|-----------------|----|----|------|

|    |     |   |     |
|----|-----|---|-----|
| SU | TZD | 5 | 7.8 |
|----|-----|---|-----|

|                 |     |   |      |
|-----------------|-----|---|------|
| DPP-4 inhibitor | Met | 1 | 14.3 |
|-----------------|-----|---|------|

|                 |     |   |      |
|-----------------|-----|---|------|
| DPP-4 inhibitor | AGI | 1 | 12.6 |
|-----------------|-----|---|------|

|                 |     |   |     |
|-----------------|-----|---|-----|
| DPP-4 inhibitor | TZD | 2 | 5.8 |
|-----------------|-----|---|-----|

**All-cause mortality**

|        |     |   |     |
|--------|-----|---|-----|
| SGLT-2 | PLA | 5 | 6.7 |
|--------|-----|---|-----|

inhibitor

|                 |     |    |     |
|-----------------|-----|----|-----|
| DPP-4 inhibitor | PLA | 10 | 9.8 |
|-----------------|-----|----|-----|

|        |    |   |      |
|--------|----|---|------|
| SGLT-2 | SU | 3 | 11.8 |
|--------|----|---|------|

inhibitor

|                              |                  |                 |    |      |
|------------------------------|------------------|-----------------|----|------|
|                              | SGLT-2 inhibitor | DPP-4 inhibitor | 3  | 3.2  |
|                              | DPP-4 inhibitor  | SU              | 9  | 22.4 |
|                              | SU               | TZD             | 2  | 11.5 |
|                              | SU               | Glitinide       | 1  | 11.5 |
|                              | DPP-4 inhibitor  | AGI             | 1  | 11.5 |
|                              | DPP-4 inhibitor  | Met             | 2  | 11.5 |
| <b>MACE<sup>d</sup></b>      |                  |                 |    |      |
|                              | SGLT-2 inhibitor | PLA             | 6  | 15.5 |
|                              | DPP-4 inhibitor  | PLA             | 9  | 15.9 |
|                              | DPP-4 inhibitor  | TZD             | 2  | 15.9 |
|                              | SU               | TZD             | 1  | 6.8  |
|                              | DPP-4 inhibitor  | SU              | 8  | 22.3 |
|                              | SGLT-2 inhibitor | SU              | 3  | 16.9 |
|                              | SGLT-2 inhibitor | DPP-4 inhibitor | 4  | 6.7  |
| <b>Serious adverse event</b> |                  |                 |    |      |
|                              | SGLT-2 inhibitor | PLA             | 7  | 10.2 |
|                              | DPP-4 inhibitor  | PLA             | 14 | 12.1 |

|                  |                 |    |      |
|------------------|-----------------|----|------|
| TZD              | PLA             | 1  | 0.7  |
| DPP-4 inhibitor  | TZD             | 2  | 7.2  |
| DPP-4 inhibitor  | Met             | 3  | 14.4 |
| DPP-4 inhibitor  | SU              | 11 | 19.4 |
| DPP-4 inhibitor  | AGI             | 1  | 14.4 |
| SGLT-2 inhibitor | DPP-4 inhibitor | 4  | 7.8  |
| SGLT-2 inhibitor | SU              | 3  | 6.4  |
| SU               | TZD             | 4  | 7.4  |

### Hypoglycemi

**a**

|                  |     |    |      |
|------------------|-----|----|------|
| SGLT-2 inhibitor | PLA | 7  | 10.0 |
| DPP-4 inhibitor  | PLA | 14 | 7.6  |
| DPP-4 inhibitor  | SU  | 10 | 18.9 |
| DPP-4 inhibitor  | Met | 3  | 11.2 |
| DPP-4 inhibitor  | AGI | 1  | 11.2 |
| DPP-4 inhibitor  | TZD | 1  | 0.8  |
| SU               | TZD | 4  | 11.0 |
| SGLT-2 inhibitor | SU  | 3  | 10.7 |

|                        |                  |                  |    |      |
|------------------------|------------------|------------------|----|------|
|                        | SGLT-2 inhibitor | DPP-4 inhibitor  | 4  | 7.3  |
|                        | SU               | Glitinide        | 1  | 11.2 |
| <b>UTI<sup>e</sup></b> |                  |                  |    |      |
|                        | SGLT-2 inhibitor | PLA              | 6  | 12.9 |
|                        | DPP-4 inhibitor  | PLA              | 9  | 13.7 |
|                        | SGLT-2 inhibitor | SU               | 3  | 13.5 |
|                        | SGLT-2 inhibitor | DPP-4 inhibitor  | 4  | 13.2 |
|                        | DPP-4 inhibitor  | SU               | 6  | 12.0 |
|                        | DPP-4 inhibitor  | AGI              | 1  | 17.4 |
|                        | DPP-4 inhibitor  | TZD              | 1  | 17.4 |
| <b>Diarrhea</b>        |                  |                  |    |      |
|                        | SGLT-2 inhibitor | PLA              | 5  | 15.2 |
|                        | DPP-4 inhibitor  | PLA              | 11 | 8.5  |
|                        | AGI <sup>h</sup> | PLA <sup>l</sup> | 1  | 12.5 |
|                        | DPP-4 inhibitor  | Met <sup>j</sup> | 1  | 12.5 |
|                        | DPP-4 inhibitor  | SU               | 9  | 19.1 |
|                        | DPP-4 inhibitor  | TZD              | 2  | 7.6  |

|                                  |                                 |   |      |
|----------------------------------|---------------------------------|---|------|
| SU                               | TZD <sup>i</sup>                | 2 | 5.8  |
| SGLT-2<br>inhibitor              | SU <sup>k</sup>                 | 2 | 18.3 |
| SGLT-2<br>inhibitor <sup>f</sup> | DPP-4<br>inhibitor <sup>g</sup> | 2 | 0.5  |

---

Note: <sup>a</sup>HbA1c, glycated hemoglobin; <sup>b</sup>2h-PPG, 2-h postprandial glucose; <sup>c</sup>FPG, fasting plasma glucose; <sup>d</sup>MACE, major adverse cardiovascular event; <sup>e</sup>UTI, urinary tract infection; <sup>f</sup>SGLT-2 inhibitor, sodium-glucose co-transporter-2 inhibitor; <sup>g</sup>DPP-4 inhibitor, dipeptidyl peptidase-4 inhibitor; <sup>h</sup>AGI,  $\alpha$ -glucosidase inhibitor; <sup>i</sup>TZD, thiazolidinedione; <sup>j</sup>Met, high dose metformin; <sup>k</sup>SU, sulfonylurea; <sup>l</sup>PLA, placebo.

**Table S8.** Sensitivity analyses for the primary outcomes

| HbA1c, %                       |                                   |                                  |                                  |                                  |                                  |                                  |                                  |
|--------------------------------|-----------------------------------|----------------------------------|----------------------------------|----------------------------------|----------------------------------|----------------------------------|----------------------------------|
| <b>PLA<sup>a</sup></b>         | <b><u>-0.72 (-0.84, 0.60)</u></b> | <b><u>-0.62 (-0.70-0.53)</u></b> | <b><u>-0.65 (-0.77-0.54)</u></b> | <b><u>-0.65 (-0.81-0.50)</u></b> | <b><u>-0.99 (-1.26-0.72)</u></b> | <b><u>-0.48 (-0.81-0.15)</u></b> | <b><u>-0.49 (-0.89-0.10)</u></b> |
| <b><u>0.72 (0.60,0.84)</u></b> | <b>SGLT2<sup>b</sup></b>          | 0.10 (-0.02,0.22)                | 0.07 (-0.06,0.20)                | 0.07 (-0.11,0.24)                | -0.27 (-0.56,0.03)               | 0.24 (-0.10,0.59)                | 0.23 (-0.17,0.63)                |
| <b><u>0.62 (0.53,0.70)</u></b> | -0.10 (-0.22,0.02)                | <b>DPP4<sup>c</sup></b>          | -0.04 (-0.13,0.05)               | -0.04 (-0.18,0.11)               | <b><u>-0.37 (-0.65-0.09)</u></b> | 0.14 (-0.18,0.46)                | 0.12 (-0.26,0.51)                |
| <b><u>0.65 (0.54,0.77)</u></b> | -0.07 (-0.20,0.06)                | 0.04 (-0.05,0.13)                | <b>SU<sup>g</sup></b>            | -0.00 (-0.14,0.14)               | <b><u>-0.34 (-0.63-0.04)</u></b> | 0.18 (-0.16,0.51)                | 0.16 (-0.22,0.54)                |
| <b><u>0.65 (0.50,0.81)</u></b> | -0.07 (-0.24,0.11)                | 0.04 (-0.11,0.18)                | 0.00 (-0.14,0.14)                | <b>TZD<sup>e</sup></b>           | <b><u>-0.34 (-0.65-0.02)</u></b> | 0.18 (-0.18,0.53)                | 0.16 (-0.24,0.56)                |
| <b><u>0.99 (0.72,1.26)</u></b> | 0.27 (-0.03,0.56)                 | <b><u>0.37 (0.09,0.65)</u></b>   | <b><u>0.34 (0.04,0.63)</u></b>   | <b><u>0.34 (0.02,0.65)</u></b>   | <b>AGI<sup>d</sup></b>           | <b><u>0.51 (0.08,0.94)</u></b>   | <b><u>0.50 (0.02,0.97)</u></b>   |
| <b><u>0.48 (0.15,0.81)</u></b> | -0.24 (-0.59,0.10)                | -0.14 (-0.46,0.18)               | -0.18 (-0.51,0.16)               | -0.18 (-0.53,0.18)               | <b><u>-0.51 (-0.94-0.08)</u></b> | <b>Met<sup>f</sup></b>           | -0.02 (-0.52,0.49)               |
| <b><u>0.49 (0.10,0.89)</u></b> | -0.23 (-0.63,0.17)                | -0.12 (-0.51,0.26)               | -0.16 (-0.54,0.22)               | -0.16 (-0.56,0.24)               | <b><u>-0.50 (-0.97-0.02)</u></b> | 0.02 (-0.49,0.52)                | <b>Meglitinide</b>               |
| Body weight, kg                |                                   |                                  |                                  |                                  |                                  |                                  |                                  |
| <b>PLA</b>                     | <b><u>-2.10 (-2.46-1.74)</u></b>  | -0.07 (-0.39,0.25)               | <b><u>2.05 (1.66,2.44)</u></b>   | <b><u>2.64 (2.01,3.27)</u></b>   | -0.89 (-2.30,0.52)               |                                  |                                  |
| <b><u>2.10 (1.74,2.46)</u></b> | <b>SGLT2</b>                      | <b><u>2.03 (1.64,2.42)</u></b>   | <b><u>4.15 (3.75,4.56)</u></b>   | <b><u>4.74 (4.09,5.40)</u></b>   | 1.21 (-0.24,2.66)                |                                  |                                  |
| 0.07 (-0.25,0.39)              | <b><u>-2.03 (-2.42-1.64)</u></b>  | <b>DPP4</b>                      | <b><u>2.12 (1.82,2.41)</u></b>   | <b><u>2.71 (2.15,3.27)</u></b>   | -0.82 (-2.26,0.62)               |                                  |                                  |

---

|                           |                           |                           |                           |                         |                           |
|---------------------------|---------------------------|---------------------------|---------------------------|-------------------------|---------------------------|
| <u>-2.05 (-2.44-1.66)</u> | <u>-4.15 (-4.56-3.75)</u> | <u>-2.12 (-2.41-1.82)</u> | SU                        | <u>0.59 (0.03,1.15)</u> | <u>-2.94 (-4.40-1.48)</u> |
| <u>-2.64 (-3.27-2.01)</u> | <u>-4.74 (-5.40-4.09)</u> | <u>-2.71 (-3.27-2.15)</u> | <u>-0.59 (-1.15-0.03)</u> | TZD                     | <u>-3.53 (-5.07-1.99)</u> |
| 0.89 (-0.52,2.30)         | -1.21 (-2.66,0.24)        | 0.82 (-0.62,2.26)         | —                         | <u>2.94 (1.48,4.40)</u> | <u>3.53 (1.99,5.07)</u>   |

---

MACE

---

|                  |                  |                  |                  |                   |  |
|------------------|------------------|------------------|------------------|-------------------|--|
| <b>PLA</b>       | 0.57 (0.27,1.22) | 0.55 (0.25,1.20) | 0.80 (0.36,1.80) | 1.81 (0.29,11.16) |  |
| 1.74 (0.82,3.71) | <b>SGLT2</b>     | 0.95 (0.46,1.97) | 1.39 (0.70,2.77) | 3.14 (0.52,18.83) |  |
| 1.83 (0.84,4.01) | 1.05 (0.51,2.18) | <b>DPP4</b>      | 1.46 (0.98,2.19) | 3.30 (0.63,17.29) |  |
| 1.25 (0.56,2.82) | 0.72 (0.36,1.43) | 0.68 (0.46,1.02) | <b>SU</b>        | 2.26 (0.42,12.06) |  |
| 0.55 (0.09,3.43) | 0.32 (0.05,1.91) | 0.30 (0.06,1.58) | 0.44 (0.08,2.37) | <b>TZD</b>        |  |

---

All-cause mortality

---

|                  |                  |                  |                  |                  |                   |
|------------------|------------------|------------------|------------------|------------------|-------------------|
| <b>PLA</b>       | 0.65 (0.22,1.89) | 0.62 (0.23,1.67) | 0.82 (0.29,2.37) | 0.29 (0.02,4.00) | 0.77 (0.04,15.12) |
| 1.54 (0.53,4.47) | <b>SGLT2</b>     | 0.95 (0.40,2.25) | 1.26 (0.58,2.75) | 0.44 (0.04,5.56) | 1.19 (0.07,21.29) |
| 1.62 (0.60,4.40) | 1.06 (0.44,2.51) | <b>DPP4</b>      | 1.33 (0.77,2.31) | 0.47 (0.04,5.53) | 1.26 (0.07,21.32) |

---



---

|                   |                   |                   |                   |                   |                       |
|-------------------|-------------------|-------------------|-------------------|-------------------|-----------------------|
| 1.22 (0.42,3.50)  | 0.79 (0.36,1.72)  | 0.75 (0.43,1.29)  | <b>SU</b>         | 0.35 (0.03,3.90)  | 0.94 (0.06,15.14)     |
| 3.45 (0.25,47.73) | 2.25 (0.18,28.13) | 2.13 (0.18,25.06) | 2.84 (0.26,31.46) | <b>TZD</b>        | 2.68<br>(0.07,105.41) |
| 1.29 (0.07,25.19) | 0.84 (0.05,15.02) | 0.80 (0.05,13.49) | 1.06 (0.07,17.07) | 0.37 (0.01,14.71) | <b>AGI</b>            |

---

Note: Bold and underline fonts indicate statistically significant differences. <sup>a</sup>PLA, placebo; <sup>b</sup>SGLT2, sodium-glucose co-transporter-2 inhibitor; <sup>c</sup>DPP4, dipeptidyl peptidase-4 inhibitor; <sup>d</sup>AGI, alpha-glucosidase inhibitor; <sup>e</sup>TZD, thiazolidinedione; <sup>f</sup>Met, high dose metformin; <sup>g</sup>SU, sulfonylurea.

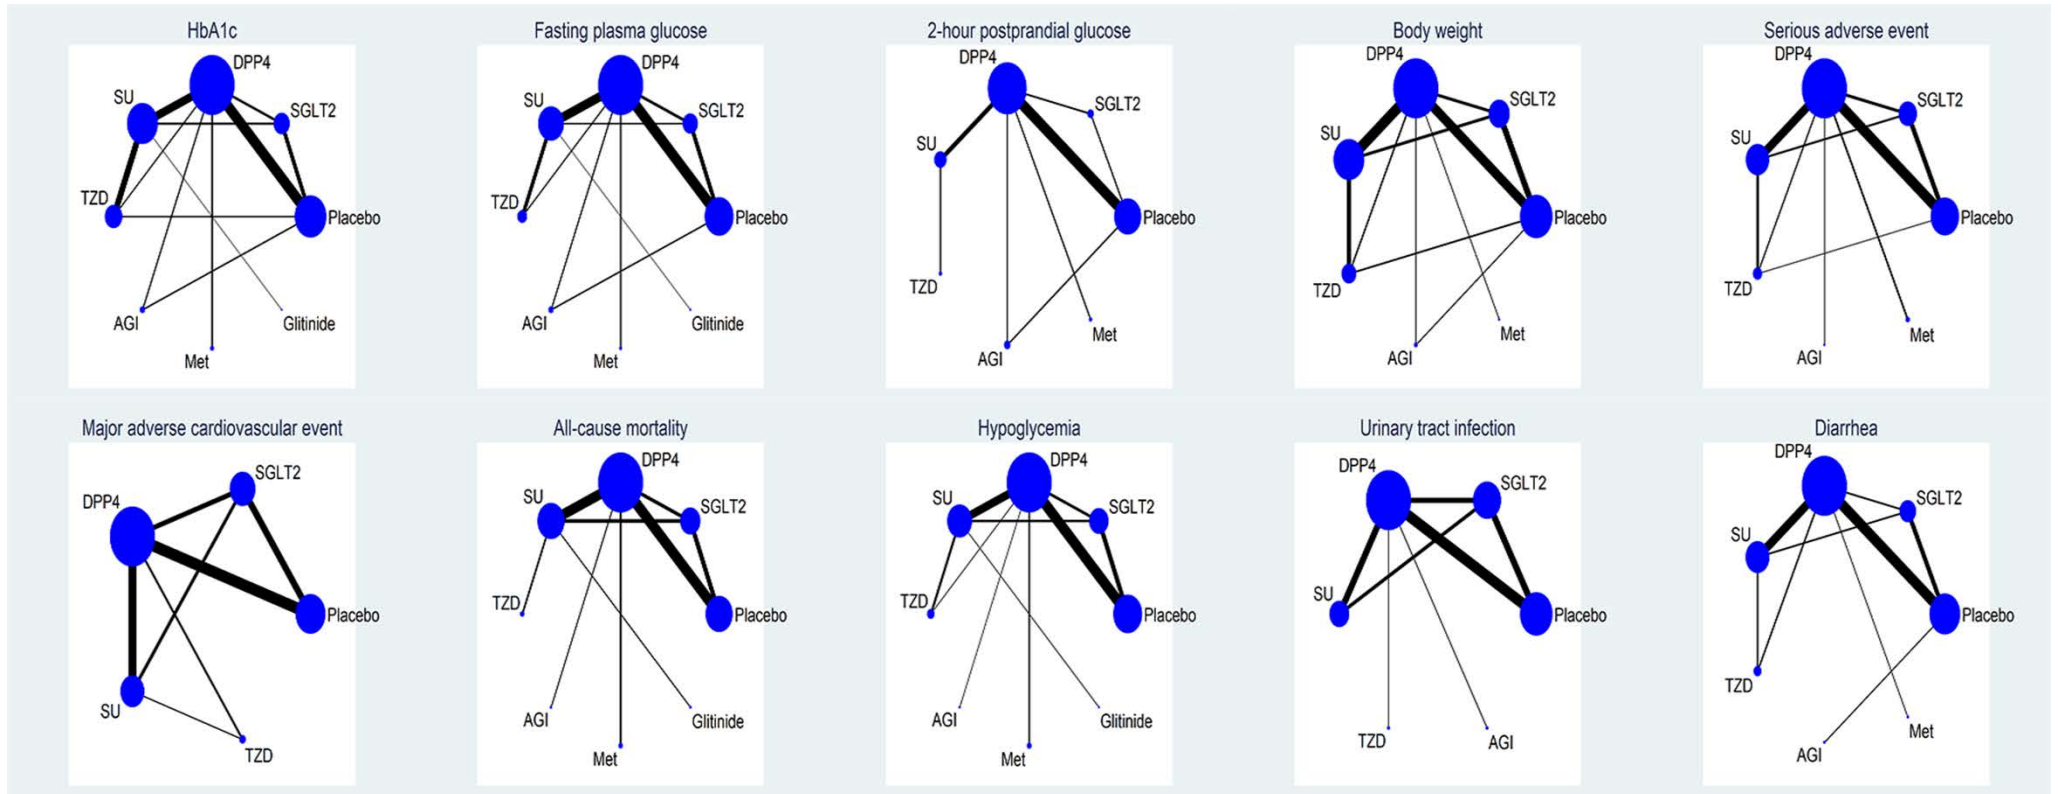

**Figure S1.** Network maps of efficacy and safety outcomes of oral antidiabetic drugs.

Note: SGLT2, sodium-glucose co-transporter-2 inhibitor; DPP4, dipeptidyl peptidase-4 inhibitor; AGI, alpha-glucosidase inhibitor; TZD, thiazolidinedione;

Met, high dose metformin; SU, sulfonylurea; Glitinide, meglitinide.



**Figure S2.** Network estimates of treatment effects for oral antidiabetic drugs

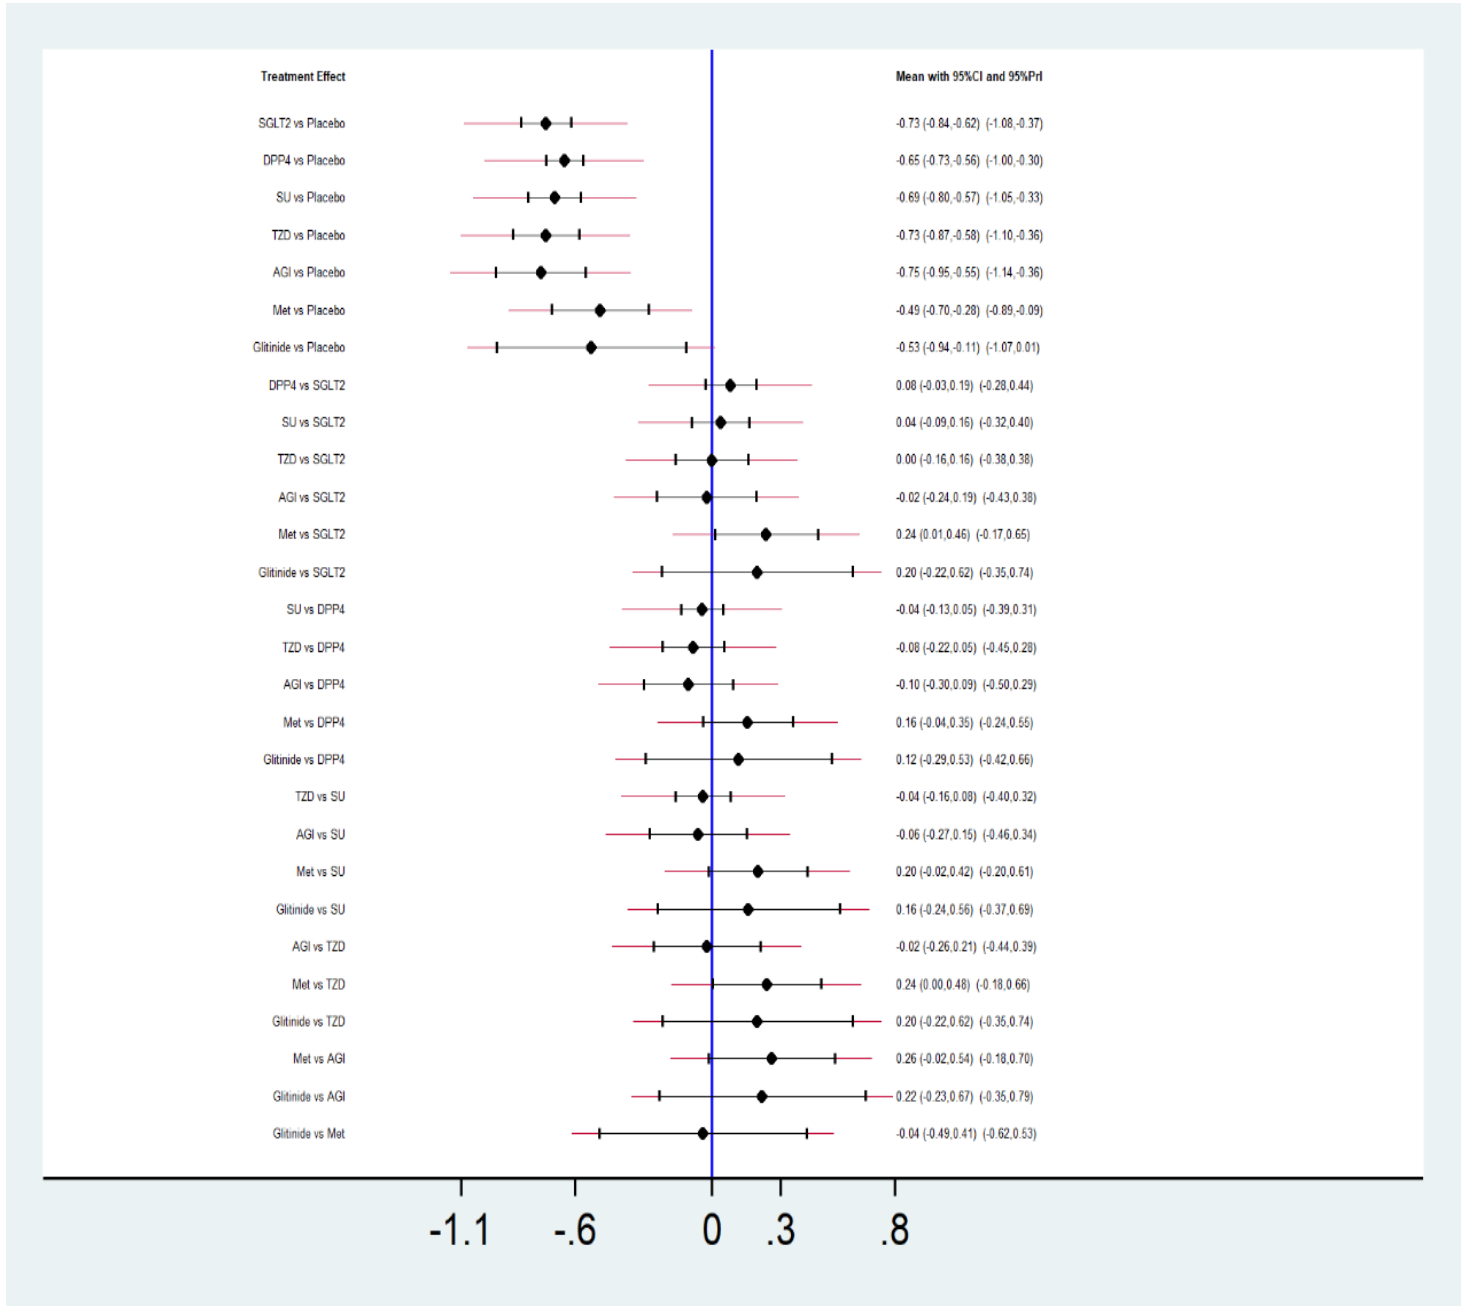

**Figure S2.a** HbA1c

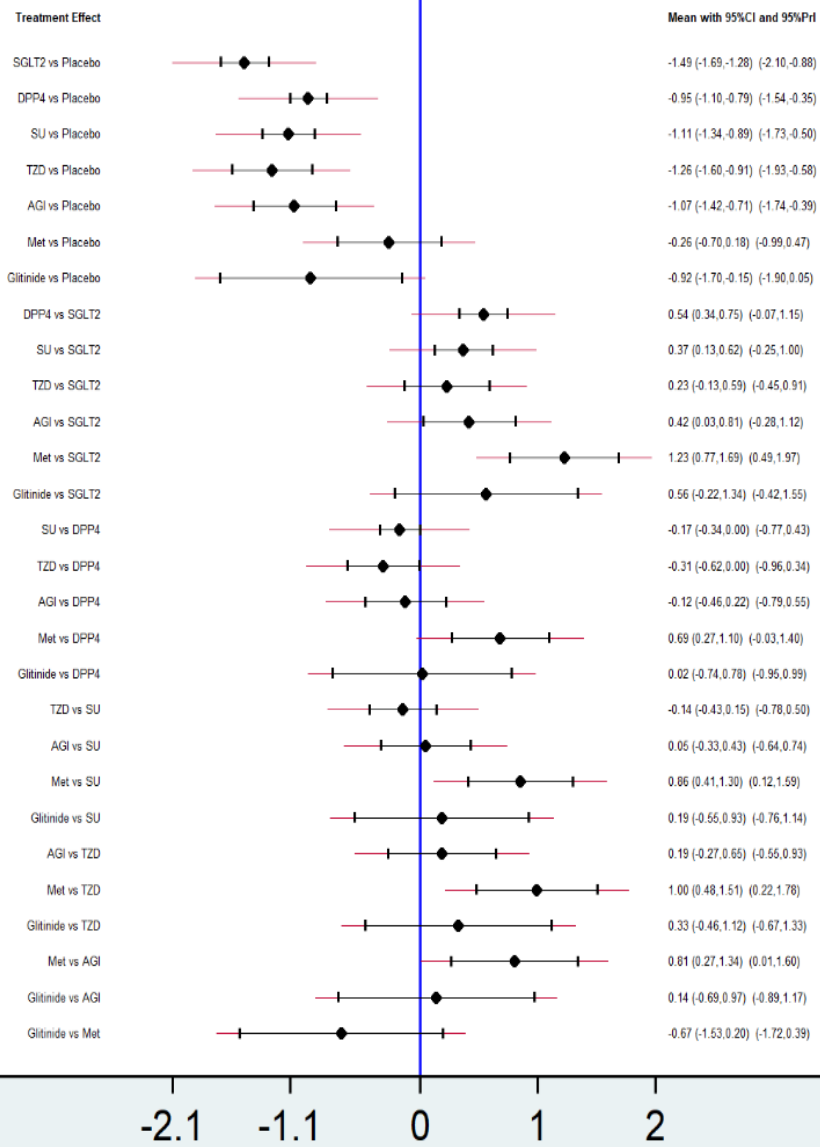

Figure S2.b FPG

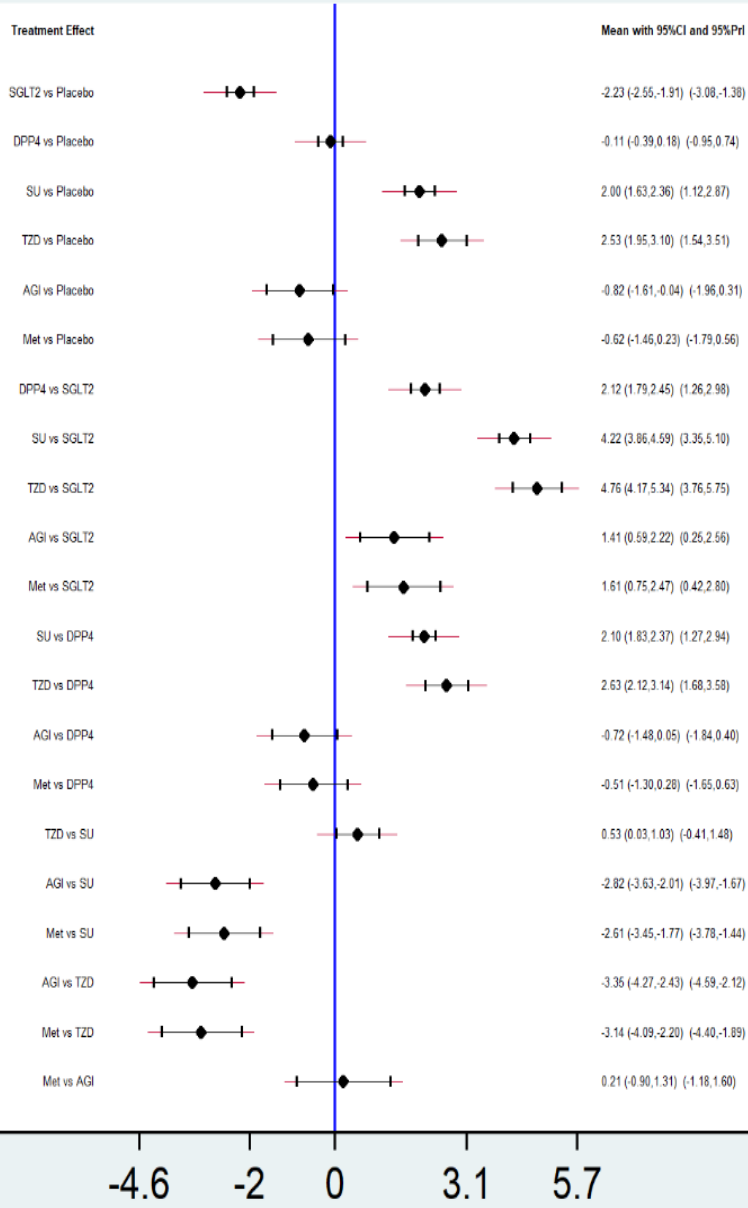

**Figure S2.c** Body weight

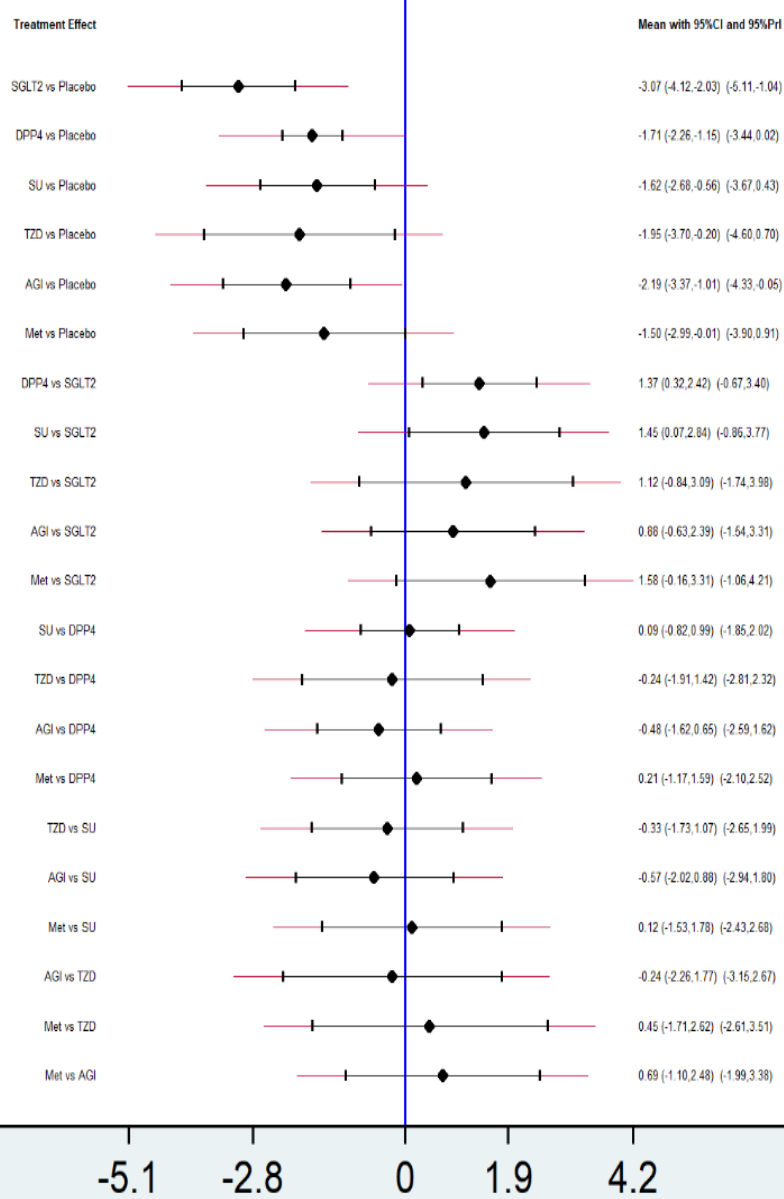

**Figure S2.d** 2h-PPG

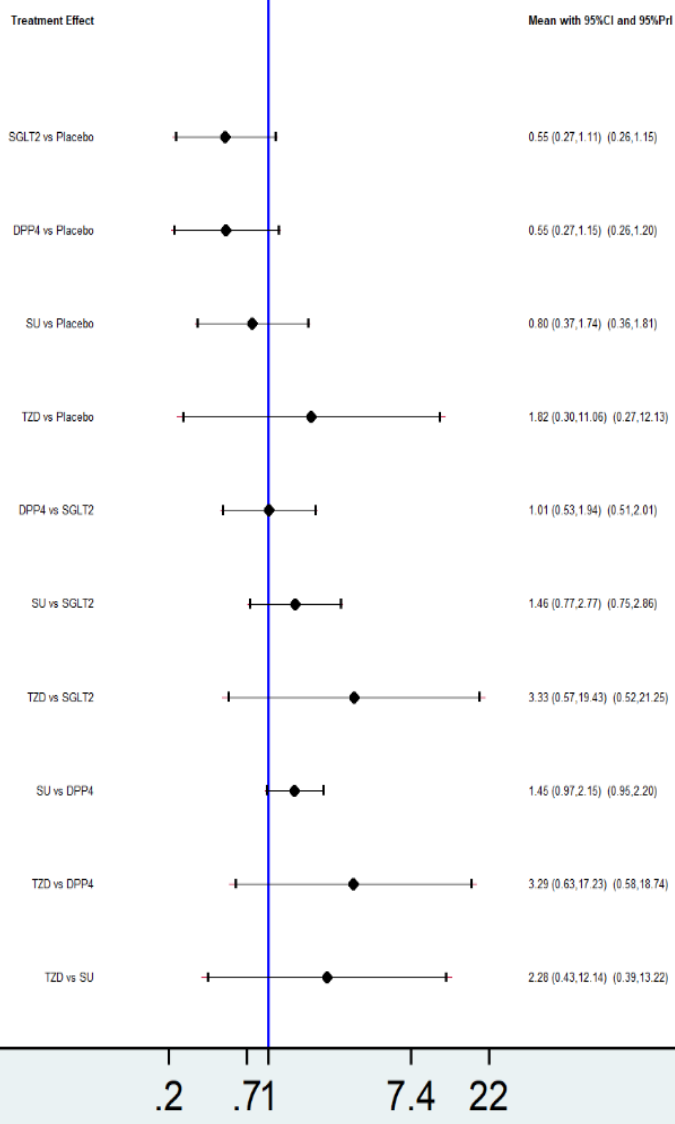

**Figure S2.e** Major adverse cardiovascular events



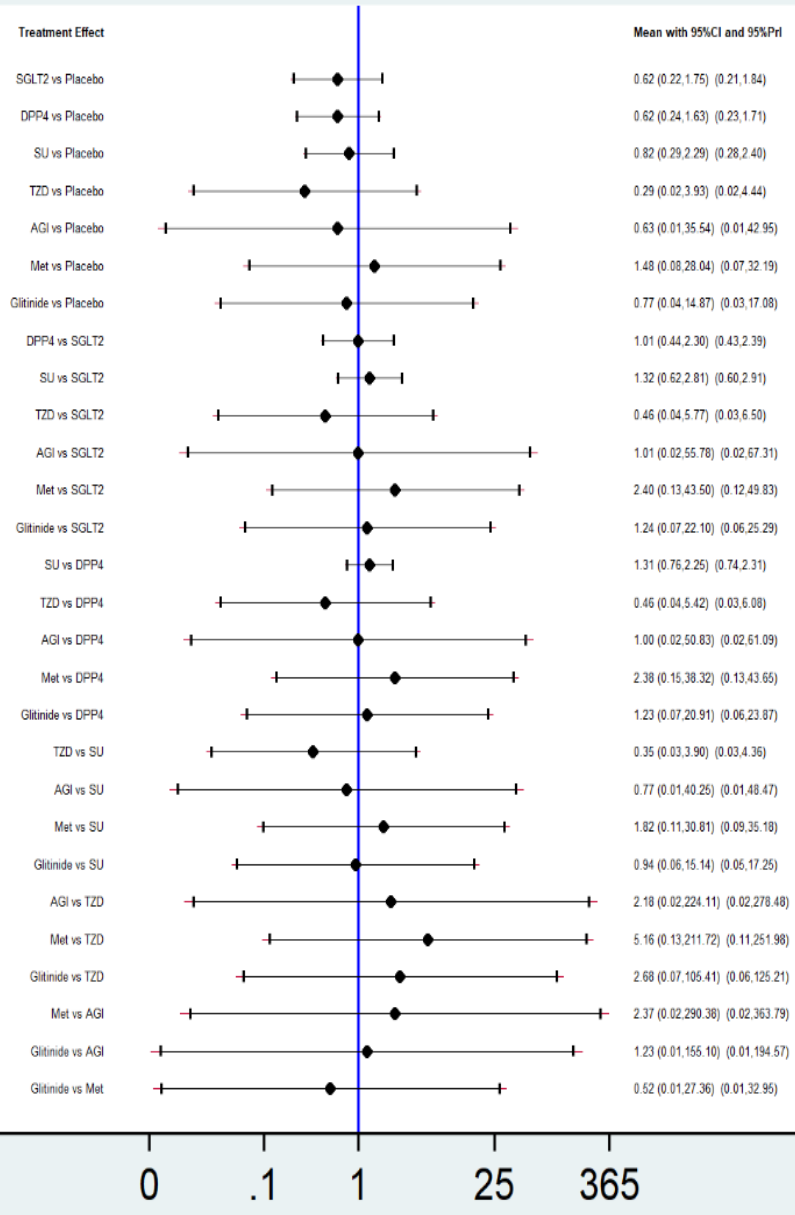

**Figure S2.f** All-cause mortality

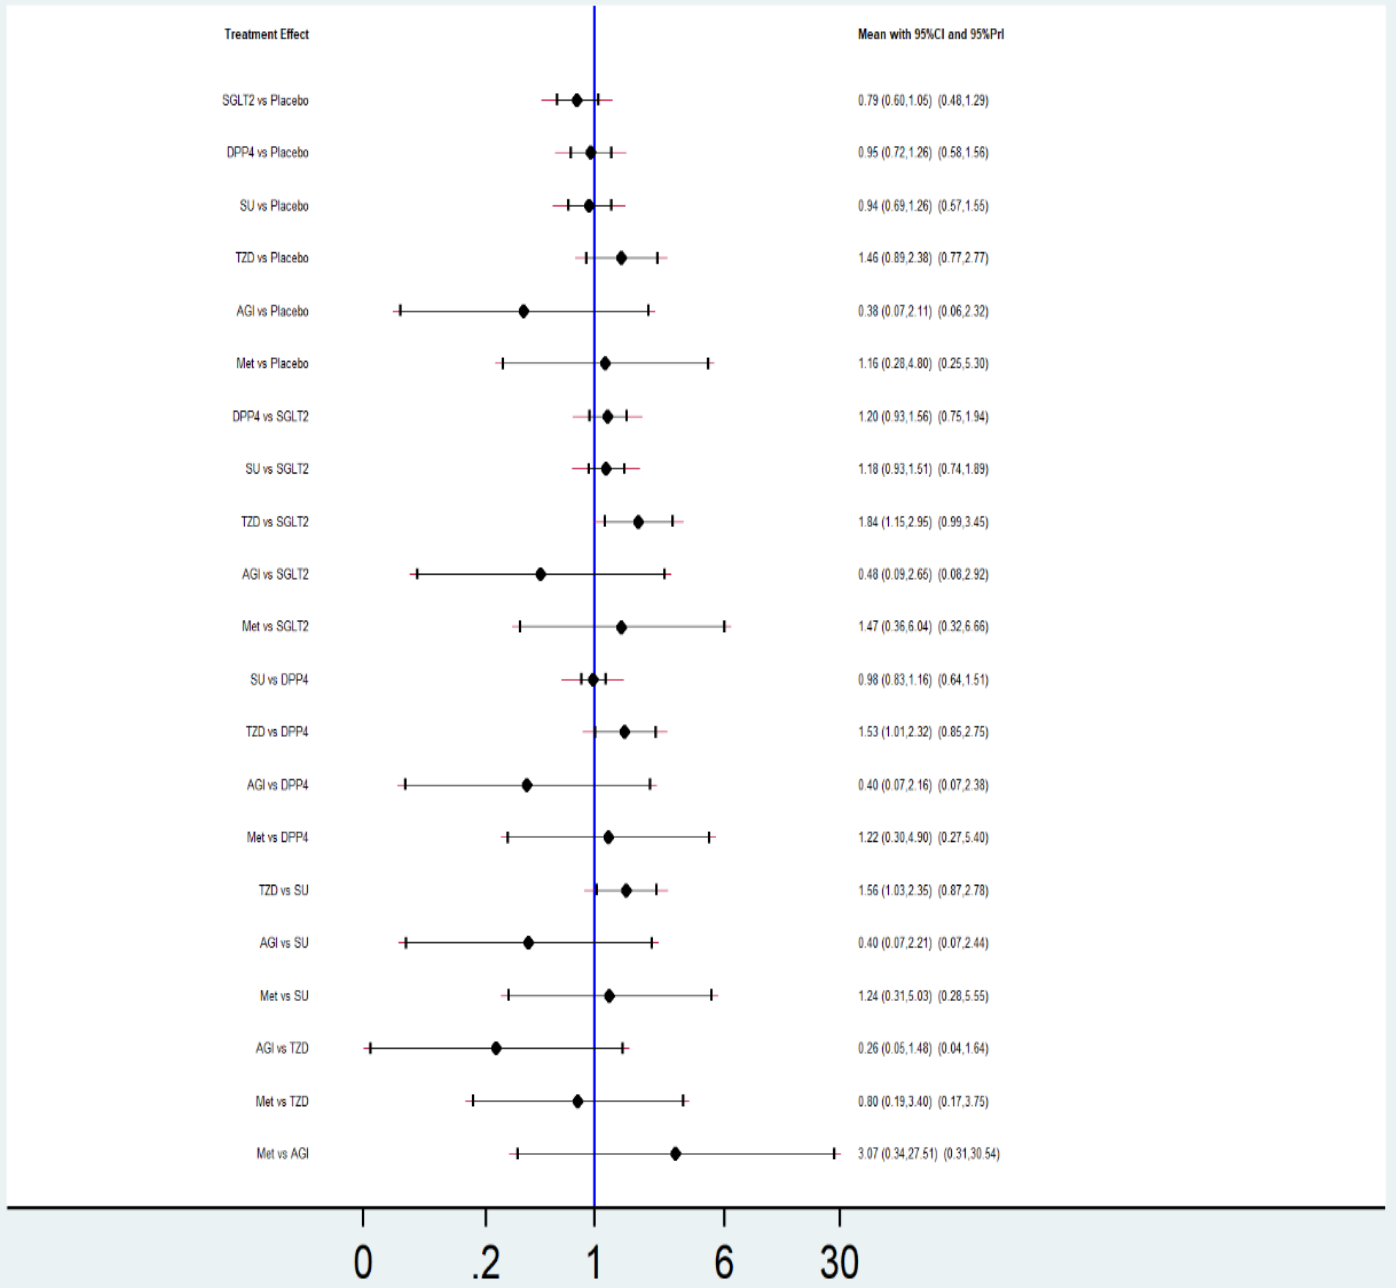

**Figure S2.g** Serious adverse event

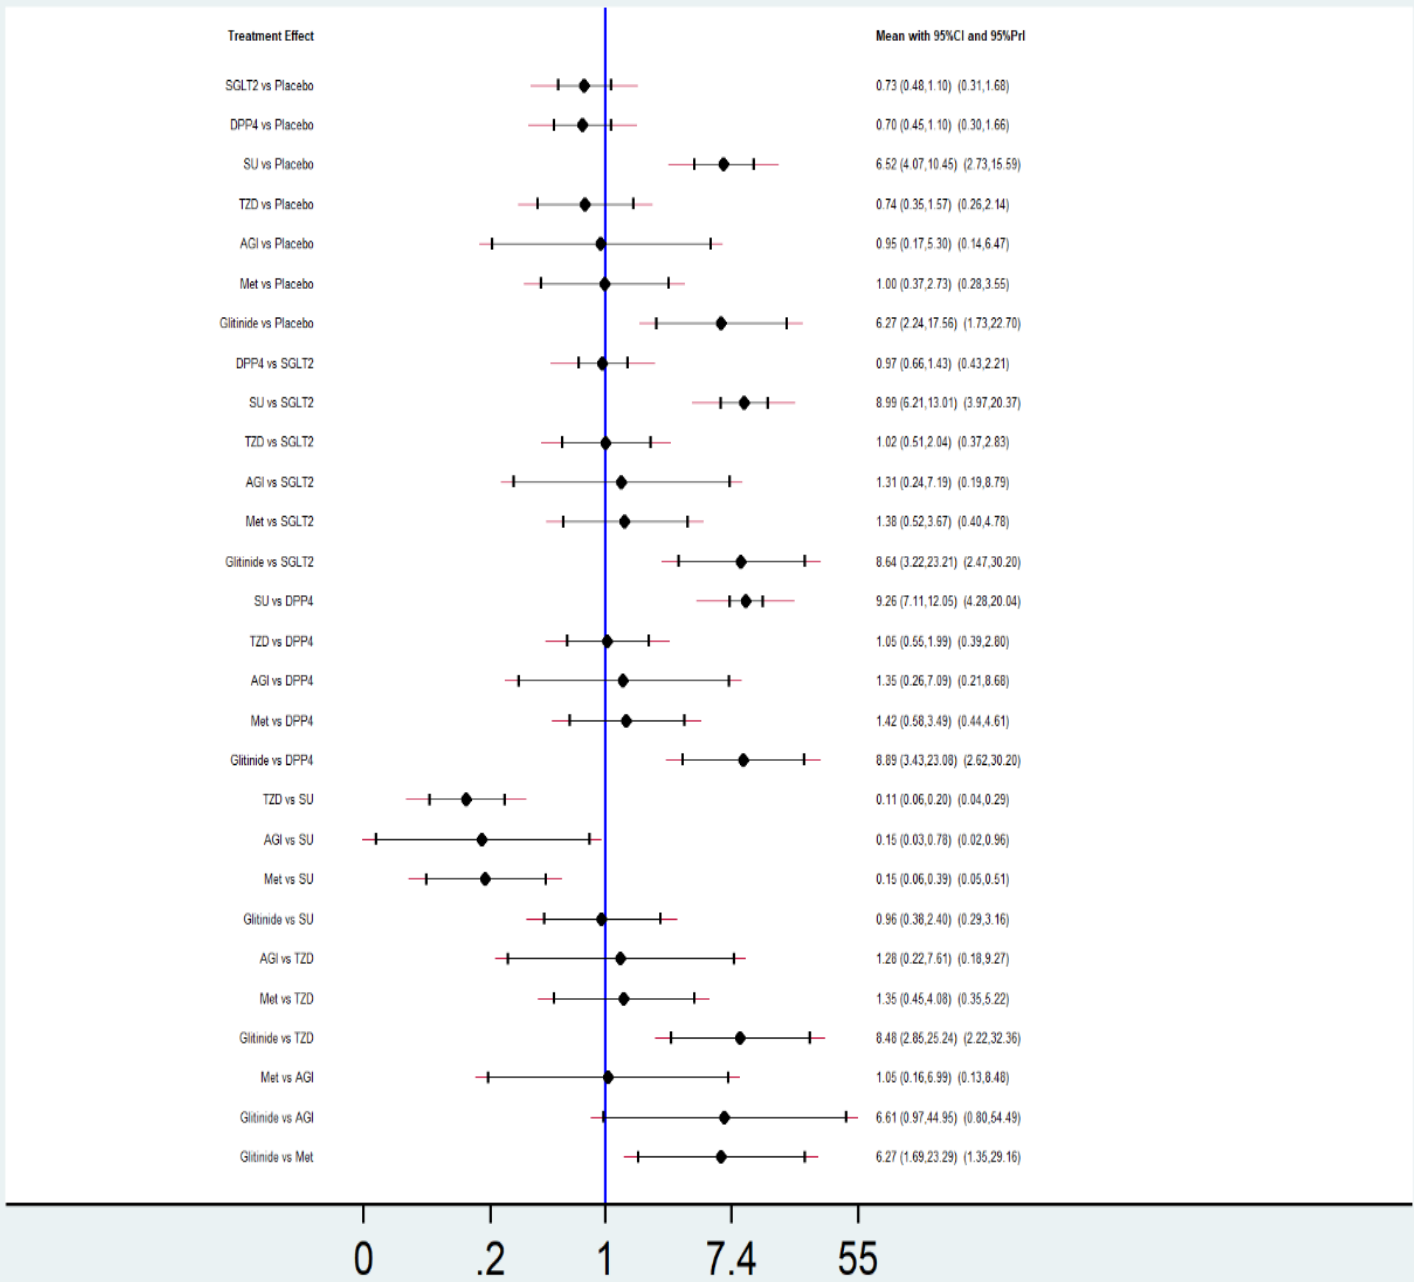

**Figure S2.h** Hypoglycemia

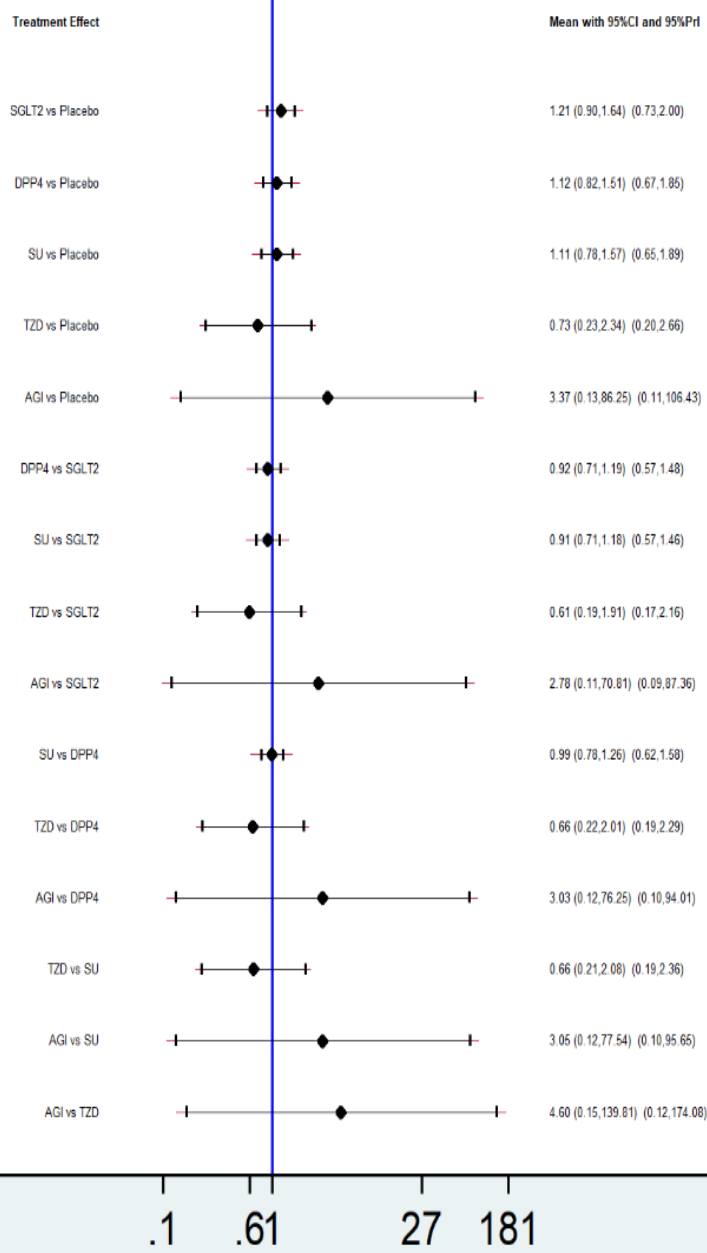

**Figure S2.i** Urinary tract infection

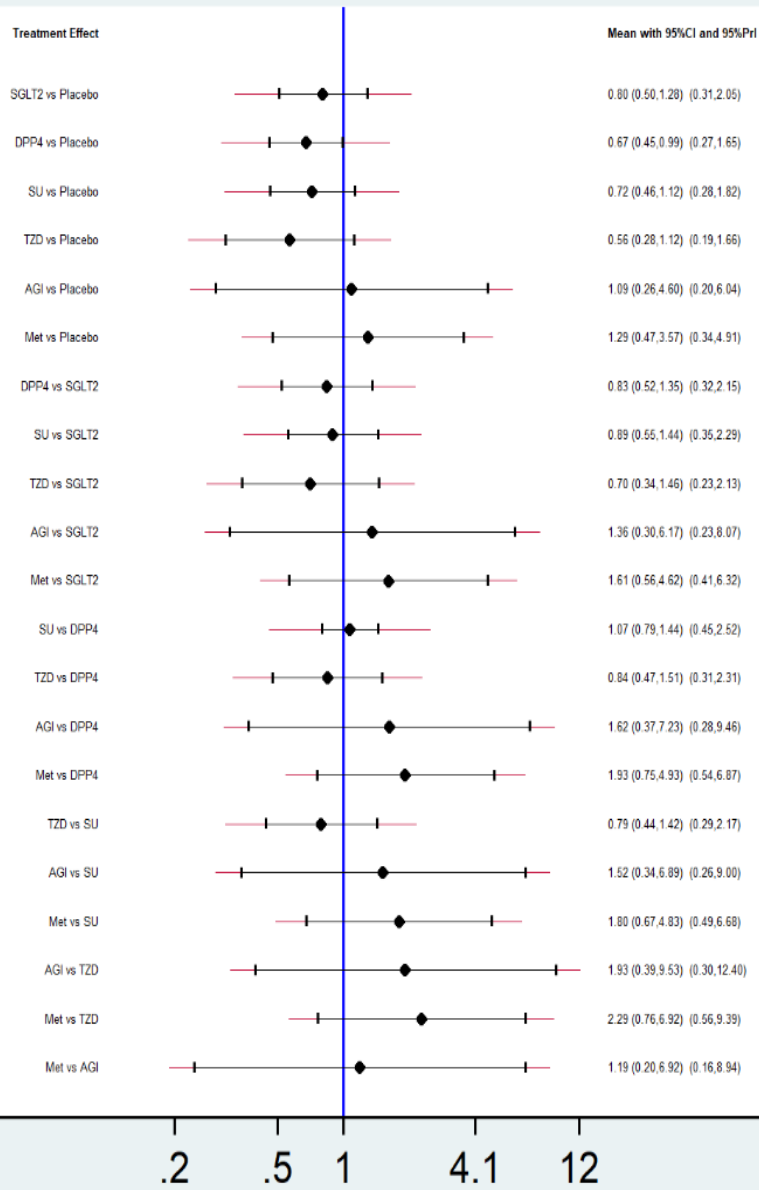

Figure S2.j Diarrhea

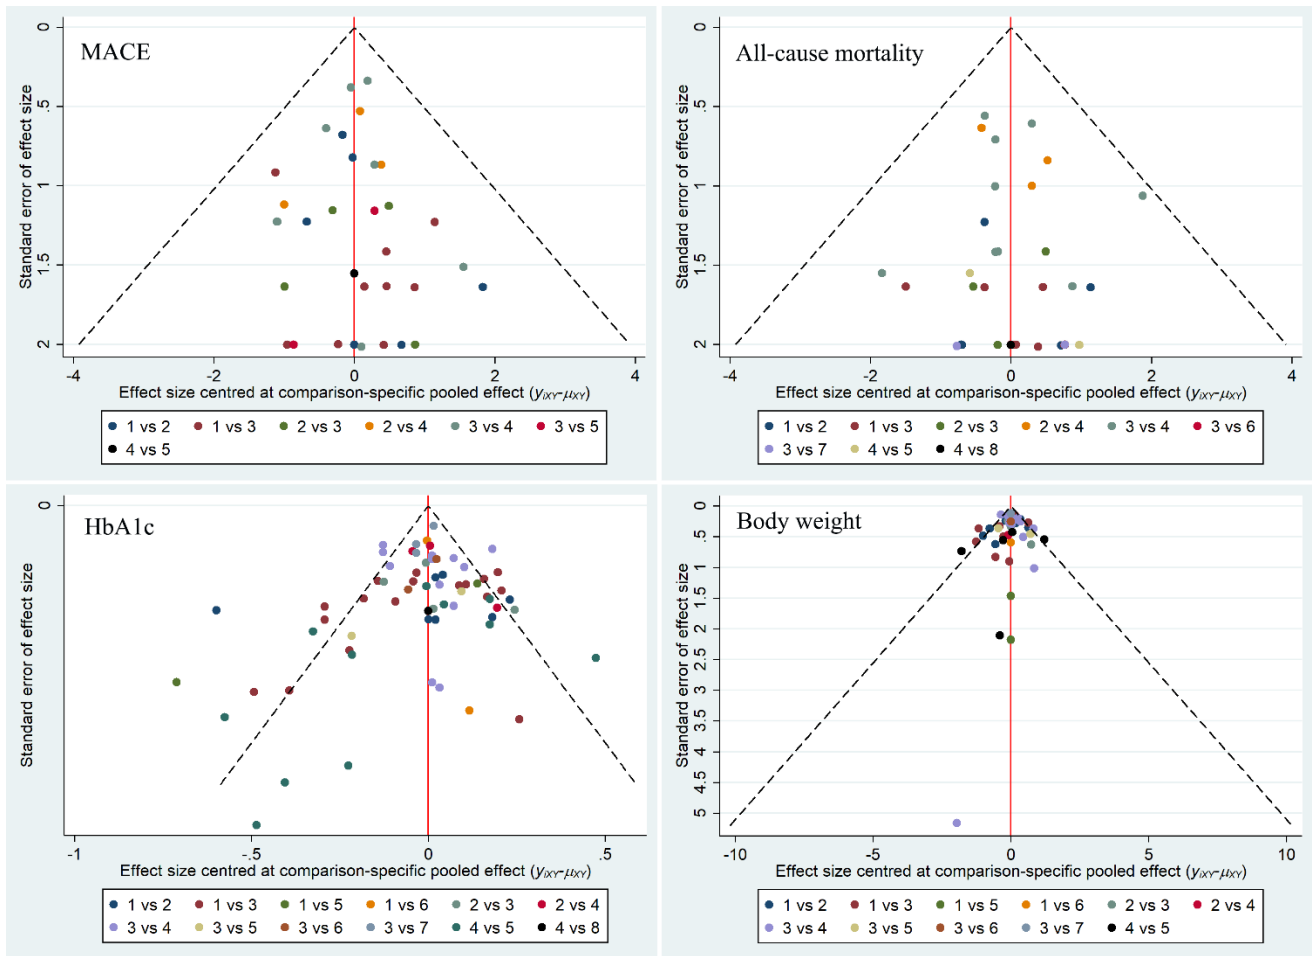

**Figure S3.** Comparison-adjusted funnel plot for the network meta-analysis on primary outcomes.

Note: 1=Placebo; 2=SGLT-2 inhibitor; 3=DPP-4 inhibitor; 4= Sulfonylurea; 5= Thiazolidinedione; 6=alpha-Glucosidase Inhibitor; 7=High dose metformin; 8= Meglitinide

## References

1. Bolinder J, Ljunggren O, Johansson L, et al. Dapagliflozin maintains glycaemic control while reducing weight and body fat mass over 2 years in patients with type 2 diabetes mellitus inadequately controlled on metformin. *Diabetes, obesity & metabolism*. 2014;16(2):159–69.
2. Bailey CJ, Gross JL, Hennicken D, Iqbal N, Mansfield TA, List JF. Dapagliflozin add-on to metformin in type 2 diabetes inadequately controlled with metformin: a randomized, double-blind, placebo-controlled 102-week trial. *BMC Med*. 2013;11–43.
3. Lavalle-González FJ, Januszewicz A, Davidson J, et al. Efficacy and safety of canagliflozin compared with placebo and sitagliptin in patients with type 2 diabetes on background metformin monotherapy: a randomised trial. *Diabetologia*. 2013;56(12):2582–92.
4. Rosenstock J, Hansen L, Zee P, et al. Dual add-on therapy in type 2 diabetes poorly controlled with metformin monotherapy: a randomized double-blind trial of saxagliptin plus dapagliflozin addition versus single addition of saxagliptin or dapagliflozin to metformin. *Diabetes Care*. 2015;38(3):376–83.
5. Del Prato S, Nauck M, Duran-Garcia S, et al. Long-term glycaemic response and tolerability of dapagliflozin versus a sulphonylurea as add-on therapy to metformin in patients with type 2 diabetes: 4-year data. *Diabetes, obesity & metabolism*. 2015;17(6):581–90.
6. Merker L, Haring HU, Christiansen AV, et al. Empagliflozin as add-on to metformin in people with Type 2 diabetes. *Diabet Med*. 2015;32(12):1555–67.

7. Bosi E, Camisasca RP, Collober C, Rochotte E, Garber AJ. Effects of vildagliptin on glucose control over 24 weeks in patients with type 2 diabetes inadequately controlled with metformin. *Diabetes Care*. 2007;30(4):890–5.
8. Bryson A, Jennings PE, Deak L, Paveliu FS, Lawson M. The efficacy and safety of teneligliptin added to ongoing metformin monotherapy in patients with type 2 diabetes: a randomized study with open label extension. *Expert opinion on pharmacotherapy*. 2016;17(10):1309–16.
9. Charbonnel B, Karasik A, Liu J, Wu M, Meininger G, Sitagliptin Study G. Efficacy and safety of the dipeptidyl peptidase-4 inhibitor sitagliptin added to ongoing metformin therapy in patients with type 2 diabetes inadequately controlled with metformin alone. *Diabetes Care*. 2006;29(12):2638–43.
10. Ahren B, Gomis R, Standl E, Mills D, Schweizer A. Twelve- and 52-week efficacy of the dipeptidyl peptidase IV inhibitor LAF237 in metformin-treated patients with type 2 diabetes. *Diabetes Care*. 2004;27(12):2874–80.
11. Handelsman Y, Lauring B, Gantz I, et al. A randomized, double-blind, non-inferiority trial evaluating the efficacy and safety of omarigliptin, a once-weekly DPP-4 inhibitor, or glimepiride in patients with type 2 diabetes inadequately controlled on metformin monotherapy. *Curr Med Res Opin*. 2017:1–19.
12. Gadde KM, Vetter ML, Iqbal N, Hardy E, Ohman P. Efficacy and safety of autoinjected exenatide once-weekly suspension versus sitagliptin or placebo with metformin in patients with type 2 diabetes: The DURATION-NEO-2 randomized clinical study. *Diabetes, obesity & metabolism*. 2017;19(7):979–88.



13. Du J, Liang L, Fang H, et al. Efficacy and Safety of Saxagliptin Compared with Acarbose in Chinese Patients with Type 2 Diabetes Mellitus Uncontrolled on Metformin Monotherapy: Results of a Phase IV Open-Label Randomized Controlled Study (The SMART Study). *Diabetes, obesity & metabolism*. 2017;19(11):1513–1520.
14. Yang W, Han P, Min KW, et al. Efficacy and safety of dapagliflozin in Asian patients with type 2 diabetes after metformin failure: A randomized controlled trial. *J Diabetes*. 2016;8(6):796–808.
15. Lu CH, Min KW, Chuang LM, Kokubo S, Yoshida S, Cha BS. Efficacy, safety, and tolerability of ipragliflozin in Asian patients with type 2 diabetes mellitus and inadequate glycemic control with metformin: results of a phase 3 randomized, placebo-controlled, double-blind, multicenter trial. *Journal of diabetes investigation*. 2016;7(3):366–73.
16. Tai H, Wang MY, Zhao YP, et al. The effect of alogliptin on pulmonary function in obese patients with type 2 diabetes inadequately controlled by metformin monotherapy. *Medicine*. 2016;95(33) (no pagination).
17. DeFronzo RA, Lewin A, Patel S, et al. Combination of empagliflozin and linagliptin as second-line therapy in subjects with type 2 diabetes inadequately controlled on metformin. *Diabetes Care*. 2015;38(3):384–93.
18. Ji LN, Pan CY, Lu JM, et al. Efficacy and safety of combination therapy with vildagliptin and metformin versus metformin uptitration in Chinese patients with type 2 diabetes inadequately controlled with metformin monotherapy: a randomized, open-label, prospective study (VISION). *Diabetes, obesity & metabolism*. 2016;18(8):775–82.

19. Wang W, Yang J, Yang G, et al. Efficacy and safety of linagliptin in Asian patients with type 2 diabetes mellitus inadequately controlled by metformin: A multinational 24-week, randomized clinical trial. *Journal of diabetes*. 2016;8(2):229–37.
20. Wang MM, Lin S, Chen YM, et al. Saxagliptin is similar in glycaemic variability more effective in metabolic control than acarbose in aged type 2 diabetes inadequately controlled with metformin. *Diabetes research and clinical practice*. 2015;108(3):e67–70.
21. Schernthaner G, Duran-Garcia S, Hanefeld M, et al. Efficacy and tolerability of saxagliptin compared with glimepiride in elderly patients with type 2 diabetes: A randomized, controlled study (GENERATION). *Diabetes, obesity & metabolism*. 2015;17(7):630–8.
22. Ridderstrale M, Andersen KR, Zeller C, et al. Comparison of empagliflozin and glimepiride as add-on to metformin in patients with type 2 diabetes: a 104-week randomised, active-controlled, double-blind, phase 3 trial. *Lancet Diabetes Endocrinol*. 2014;2(9):691–700.
23. Del Prato S, Camisasca R, Wilson C, Fleck P. Durability of the efficacy and safety of alogliptin compared with glipizide in type 2 diabetes mellitus: a 2-year study. *Diabetes, obesity & metabolism*. 2014;16(12):1239–46.
24. Derosa G, Bonaventura A, Bianchi L, et al. Vildagliptin compared to glimepiride on post-prandial lipemia and on insulin resistance in type 2 diabetic patients. *Metabolism: Clinical and Experimental*. 2014;63(7):957–67.
25. Kashiwagi A, Kazuta K, Goto K, Yoshida S, Ueyama E, Utsuno A. Ipragliflozin in combination with metformin for the treatment of Japanese

- patients with type 2 diabetes: ILLUMINATE, a randomized, double-blind, placebo-controlled study. *Diabetes, obesity & metabolism*. 2015;17(3):304–8.
26. Cefalu WT, Leiter LA, Yoon KH, et al. Efficacy and safety of canagliflozin versus glimepiride in patients with type 2 diabetes inadequately controlled with metformin (CANTATA-SU): 52 week results from a randomised, double-blind, phase 3 non-inferiority trial. *Lancet (London, England)*. 2013;382(9896):941–50.
  27. Berndt-Zipfel C, Michelson G, Dworak M, et al. Vildagliptin in addition to metformin improves retinal blood flow and erythrocyte deformability in patients with type 2 diabetes mellitus - results from an exploratory study. *Cardiovascular diabetology*. 2013;12–59.
  28. Yang W, Guan Y, Shentu Y, et al. The addition of sitagliptin to ongoing metformin therapy significantly improves glycemic control in Chinese patients with type 2 diabetes. *Journal of diabetes*. 2012;4(3):227–37.
  29. Gallwitz B, Rosenstock J, Rauch T, et al. 2-year efficacy and safety of linagliptin compared with glimepiride in patients with type 2 diabetes inadequately controlled on metformin: A randomised, double-blind, non-inferiority trial. *The Lancet*. 2012;380(9840):475–83.
  30. Derosa G, Carbone A, D'Angelo A, et al. A randomized, double-blind, placebo-controlled trial evaluating sitagliptin action on insulin resistance parameters and beta-cell function. *Expert opinion on pharmacotherapy*. 2012;13(17):2433–42.
  31. Derosa G, Ragonesi PD, Carbone A, et al. Vildagliptin added to metformin on  $\beta$ -cell function after a euglycemic hyperinsulinemic and hyperglycemic

- clamp in type 2 diabetes patients. *Diabetes technology & therapeutics*. 2012;14(6):475–84.
32. Yang W, Pan CY, Tou C, Zhao J, Gause-Nilsson I. Efficacy and safety of saxagliptin added to metformin in Asian people with type 2 diabetes mellitus: A randomized controlled trial. *Diabetes research and clinical practice*. 2011;94(2):217–24.
33. Bergenstal RM, Forti A, Chiasson JL, Woloschak M, Boldrin M, Balena R. Efficacy and safety of taspoglutide versus sitagliptin for type 2 diabetes mellitus (T-Emerge 4 Trial). *Diabetes Therapy*. 2012;3(1):1–19.
34. Pan C, Xing X, Han P, et al. Efficacy and tolerability of vildagliptin as add-on therapy to metformin in Chinese patients with type 2 diabetes mellitus. *Diabetes, obesity & metabolism*. 2012;14(8):737–44.
35. Jeon HJ, Oh TK. Comparison of vildagliptin-metformin and glimepiride-metformin treatments in type 2 diabetic patients. *Diabetes Metab J*. 2011;35(5):529–35.
36. Seck T, Nauck M, Sheng D, et al. Safety and efficacy of treatment with sitagliptin or glipizide in patients with type 2 diabetes inadequately controlled on metformin: a 2-year study. *International journal of clinical practice*. 2010;64(5):562–76.
37. Göke B, Gallwitz B, Eriksson J, Hellqvist Å, Gause-Nilsson I. Saxagliptin is non-inferior to glipizide in patients with type 2 diabetes mellitus inadequately controlled on metformin alone: A 52-week randomised controlled trial. *International journal of clinical practice*. 2010;64(12):1619–31.
38. Matthews DR, Dejager S, Ahren B, et al. Vildagliptin add-on to metformin produces similar efficacy and reduced hypoglycaemic risk compared with

- glimepiride, with no weight gain: Results from a 2-year study. *Diabetes, Obesity and Metabolism*. 2010;12(9):780–9.
39. Filozof C, Gautier JF. A comparison of efficacy and safety of vildagliptin and gliclazide in combination with metformin in patients with Type 2 diabetes inadequately controlled with metformin alone: a 52-week, randomized study. *Diabetic medicine*. 2010;27(3):318–26.
  40. Filozof C, Schwartz S, Foley JE. Effect of vildagliptin as add-on therapy to a low-dose metformin. *World J Diabetes*. 2010;1(1):19–26.
  41. Arechavaleta R, Seck T, Chen Y, et al. Efficacy and safety of treatment with sitagliptin or glimepiride in patients with type 2 diabetes inadequately controlled on metformin monotherapy: A randomized, double-blind, non-inferiority trial. *Diabetes, Obesity and Metabolism*. 2011;13(2):160–8.
  42. Taskinen MR, Rosenstock J, Tamminen I, et al. Safety and efficacy of linagliptin as add-on therapy to metformin in patients with type 2 diabetes: a randomized, double-blind, placebo-controlled study. *Diabetes, obesity & metabolism*. 2011;13(1):65–74.
  43. Goodman M, Thurston H, Penman J. Efficacy and tolerability of vildagliptin in patients with type 2 diabetes inadequately controlled with metformin monotherapy. *Hormone and metabolic research*. 2009;41(5):368–73.
  44. Bergenstal RM, Wysham C, Macconell L, et al. Efficacy and safety of exenatide once weekly versus sitagliptin or pioglitazone as an adjunct to metformin for treatment of type 2 diabetes (DURATION-2): a randomised trial. *Lancet*. 2010;376(9739):431–9.
  45. Nauck MA, Ellis GC, Fleck PR, Wilson CA, Mekki Q. Efficacy and safety of adding the dipeptidyl peptidase-4 inhibitor alogliptin to metformin therapy in

- patients with type 2 diabetes inadequately controlled with metformin monotherapy: a multicentre, randomised, double-blind, placebo-controlled study. *International journal of clinical practice*. 2009;63(1):46–55.
46. DeFronzo RA, Hissa MN, Garber AJ, et al. The efficacy and safety of saxagliptin when added to metformin therapy in patients with inadequately controlled type 2 diabetes with metformin alone. *Diabetes care*. 2009;32(9):1649–55.
47. Bolli G, Dotta F, Colin L, Minic B, Goodman M. Comparison of vildagliptin and pioglitazone in patients with type 2 diabetes inadequately controlled with metformin. *Diabetes, obesity & metabolism*. 2009;11(6):589–95.
48. Raz I, Chen Y, Wu M, et al. Efficacy and safety of sitagliptin added to ongoing metformin therapy in patients with type 2 diabetes. *Current Medical Research and Opinion*. 2008;24(2):537–50.
49. Xiao CC, Ren A, Yang J, et al. Effects of pioglitazone and glipizide on platelet function in patients with type 2 diabetes. *Eur Rev Med Pharmacol Sci*. 2015;19(6):963–70.
50. Ohira M, Yamaguchi T, Saiki A, et al. Pioglitazone improves the cardio-ankle vascular index in patients with type 2 diabetes mellitus treated with metformin. *Diabetes, metabolic syndrome and obesity : targets and therapy*. 2014;7:313–9.
51. Genovese S, Passaro A, Brunetti P, et al. Pioglitazone Randomised Italian Study on Metabolic Syndrome (PRISMA): effect of pioglitazone with metformin on HDL-C levels in Type 2 diabetic patients. *Journal of endocrinological investigation*. 2013;36(8):606–16.

52. Pfutzner A, Schondorf T, Tschöpe D, et al. PIOfix-study: effects of pioglitazone/metformin fixed combination in comparison with a combination of metformin with glimepiride on diabetic dyslipidemia. *Diabetes Technol Ther.* 2011;13(6):637–43.
53. Petrica L, Vlad A, Petrica M, et al. Pioglitazone delays proximal tubule dysfunction and improves cerebral vessel endothelial dysfunction in normoalbuminuric people with type 2 diabetes mellitus. *Diabetes research and clinical practice.* 2011;94(1):22–32.
54. Petrica L, Petrica M, Vlad A, et al. Nephro- and neuroprotective effects of rosiglitazone versus glimepiride in normoalbuminuric patients with type 2 diabetes mellitus: a randomized controlled trial. *Wiener klinische Wochenschrift.* 2009;121(23-24):765–75.
55. Khanolkar MP, Morris RH, Thomas AW, et al. Rosiglitazone produces a greater reduction in circulating platelet activity compared with gliclazide in patients with type 2 diabetes mellitus--an effect probably mediated by direct platelet PPARgamma activation. *Atherosclerosis.* 2008;197(2):718–24.
56. Kelly AS, Thelen AM, Kaiser DR, Gonzalez-Campoy JM, Bank AJ. Rosiglitazone improves endothelial function and inflammation but not asymmetric dimethylarginine or oxidative stress in patients with type 2 diabetes mellitus. *Vascular medicine (London, England).* 2007;12(4):311–8.
57. Umpierrez G, Issa M, Vlaisnjic A. Glimepiride versus pioglitazone combination therapy in subjects with type 2 diabetes inadequately controlled on metformin monotherapy: results of a randomized clinical trial. *Curr Med Res Opin.* 2006;22(4):751–9.

58. Ristic S, Collober-Maugeais C, Pecher E, Cressier F. Comparison of nateglinide and gliclazide in combination with metformin, for treatment of patients with Type 2 diabetes mellitus inadequately controlled on maximum doses of metformin alone. *Diabet Med.* 2006;23(7):757–62.
59. Garber A, Klein E, Bruce S, Sankoh S, Mohideen P. Metformin-glibenclamide versus metformin plus rosiglitazone in patients with type 2 diabetes inadequately controlled on metformin monotherapy. *Diabetes, obesity & metabolism.* 2006;8(2):156–63.
60. Bakris GL, Ruilope LM, McMorn SO, et al. Rosiglitazone reduces microalbuminuria and blood pressure independently of glycemia in type 2 diabetes patients with microalbuminuria. *J Hypertens.* 2006;24(10):2047–55.
61. Negro R, Mangieri T, Dazzi D, Pezzarossa A, Hassan H. Rosiglitazone effects on blood pressure and metabolic parameters in nondipper diabetic patients. *Diabetes research and clinical practice.* 2005;70(1):20–5.
62. Matthews DR, Charbonnel BH, Hanefeld M, Brunetti P, Schernthaner G. Long-term therapy with addition of pioglitazone to metformin compared with the addition of gliclazide to metformin in patients with type 2 diabetes: a randomized, comparative study. *Diabetes/metabolism research and reviews.* 2005;21(2):167–74.
63. Derosa G, Cicero AF, Gaddi AV, et al. Long-term effects of glimepiride or rosiglitazone in combination with metformin on blood pressure control in type 2 diabetic patients affected by the metabolic syndrome: a 12-month, double-blind, randomized clinical trial. *Clinical therapeutics.* 2005;27(9):1383–91.



64. Phillips P, Karrasch J, Scott R, Wilson D, Moses R. Acarbose improves glycemic control in overweight type 2 diabetic patients insufficiently treated with metformin. *Diabetes Care*. 2003;26(2):269–73.
65. Halimi S, Le Berre MA, Grange V. Efficacy and safety of acarbose add-on therapy in the treatment of overweight patients with Type 2 diabetes inadequately controlled with metformin: a double-blind, placebo-controlled study. *Diabetes research and clinical practice*. 2000;50(1):49–56.
66. Ferrannini E, Berk A, Hantel S, et al. Long-term safety and efficacy of empagliflozin, sitagliptin, and metformin: an active-controlled, parallel-group, randomized, 78-week open-label extension study in patients with type 2 diabetes. *Diabetes Care*. 2013;36(12):4015–21.
67. Blonde L, Stenlof K, Fung A, Xie J, Canovatchel W, Meininger G. Effects of canagliflozin on body weight and body composition in patients with type 2 diabetes over 104 weeks. *Postgraduate medicine*. 2016;128(4):371–80.
68. Dei Cas A, Spigoni V, Cito M, et al. Vildagliptin, but not glibenclamide, increases circulating endothelial progenitor cell number: a 12-month randomized controlled trial in patients with type 2 diabetes. *Cardiovascular diabetology*. 2017;16(1) (no pagination).
